# Supplementary material for: Rice Husk Shredding as a Means of Increasing the Long-Term Mechanical Properties of Earthen Mixtures for 3D Printing
Source: Preprints.org preprint supplement (doi:10.20944/preprints202112.0360.v1), 2021-12-22
Supplement: Supplementary file 1 [file supplementary]

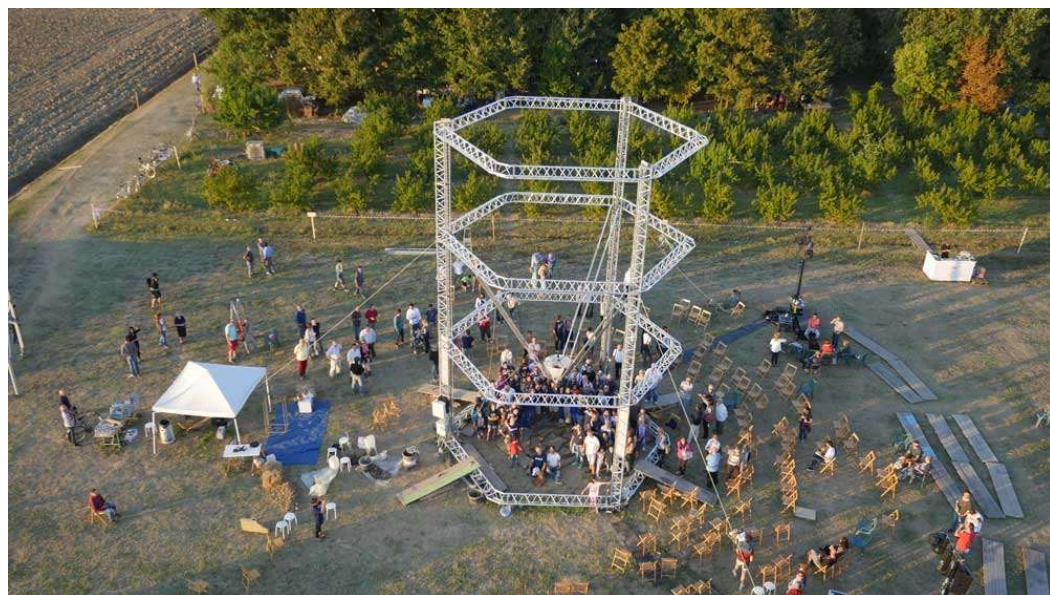

**Figure S1.** The BigDelta 3D printer made by WASP [source WASP].

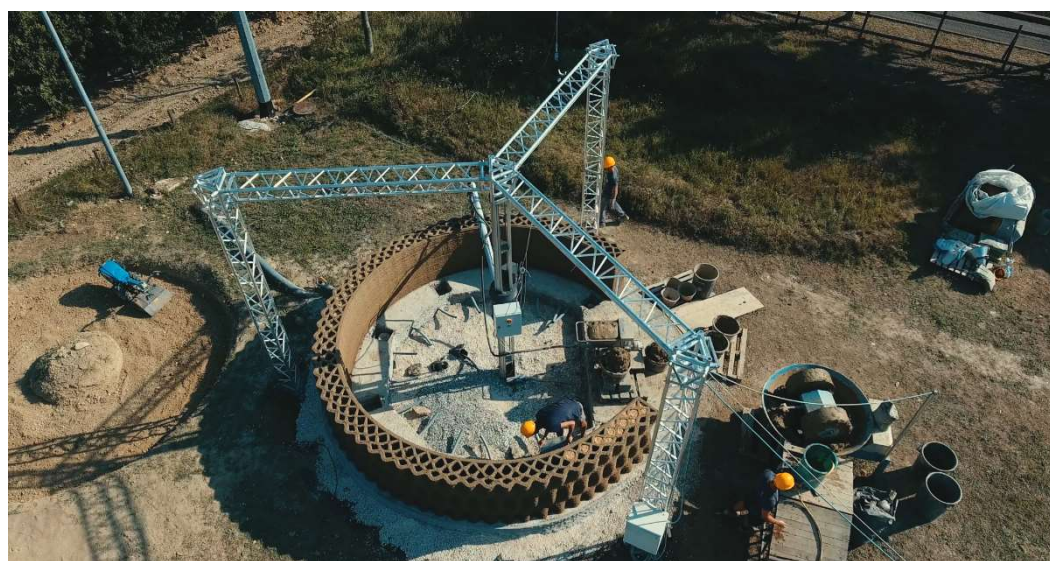

**Figure S2.** The Crane WASP: a collaborative 3D printing system targeted to end-use production of functional buildings [source WASP].



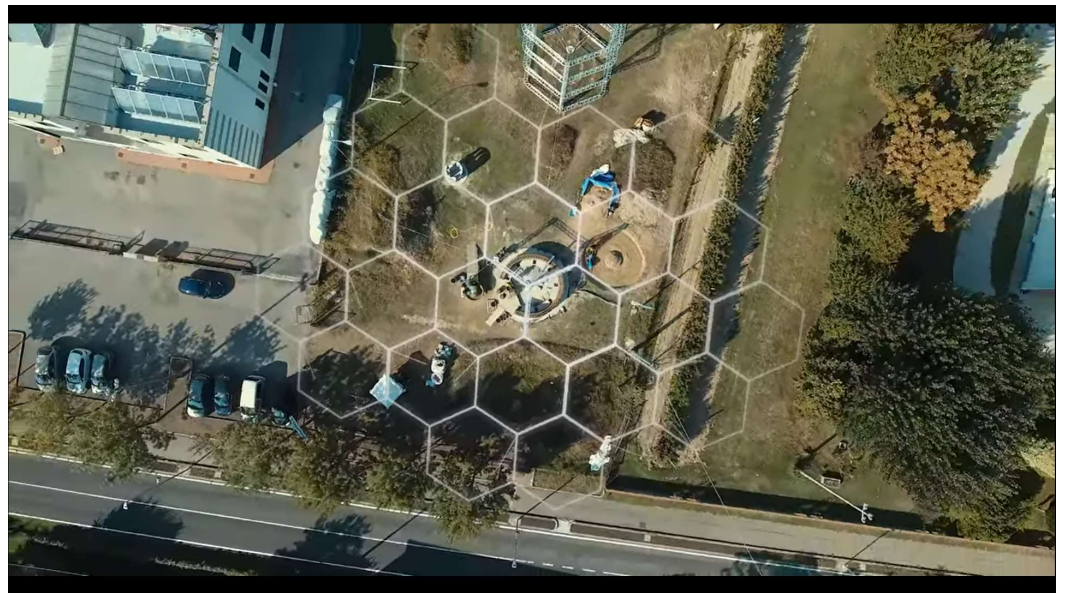

**Video S1.** Unveiling the new WASP house 3D printer | Event 6-7 October 2018;  
<https://www.youtube.com/watch?app=desktop&v=KS1mb8OVE-E&list=PLKS-fMq7r3YolyGxCU8xhfNLVcLH5KMhxT&t=0s&index=7> [source WASP].

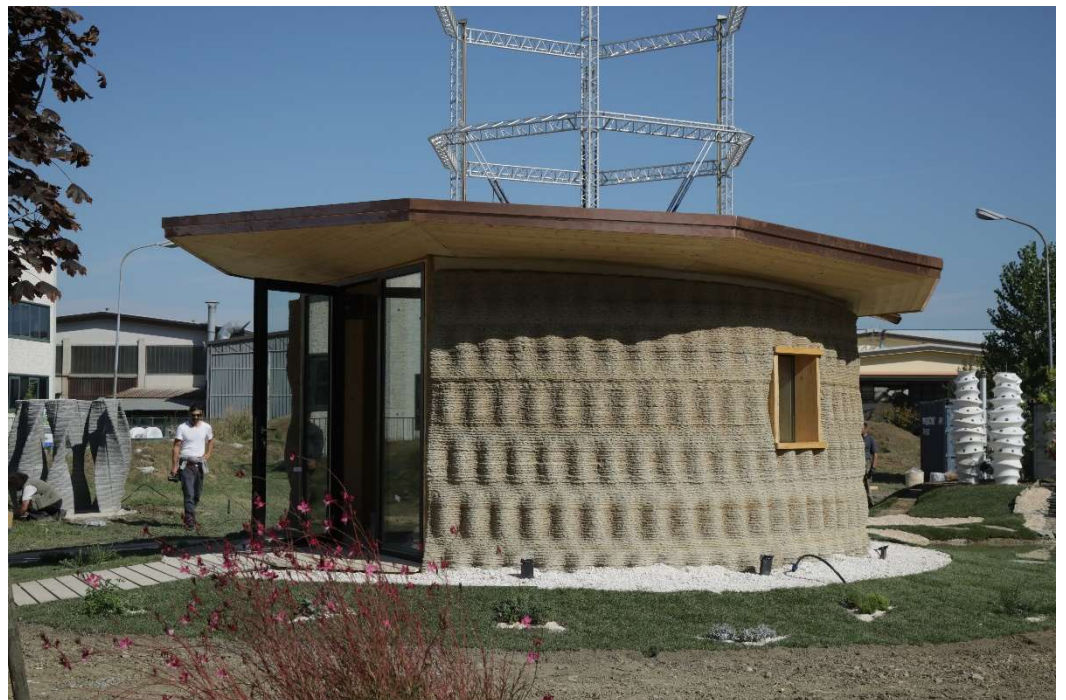

**Figure S3.** The Gaia House by WASP: a 3D-printed prototype constructed of biodegradable materials [source WASP].

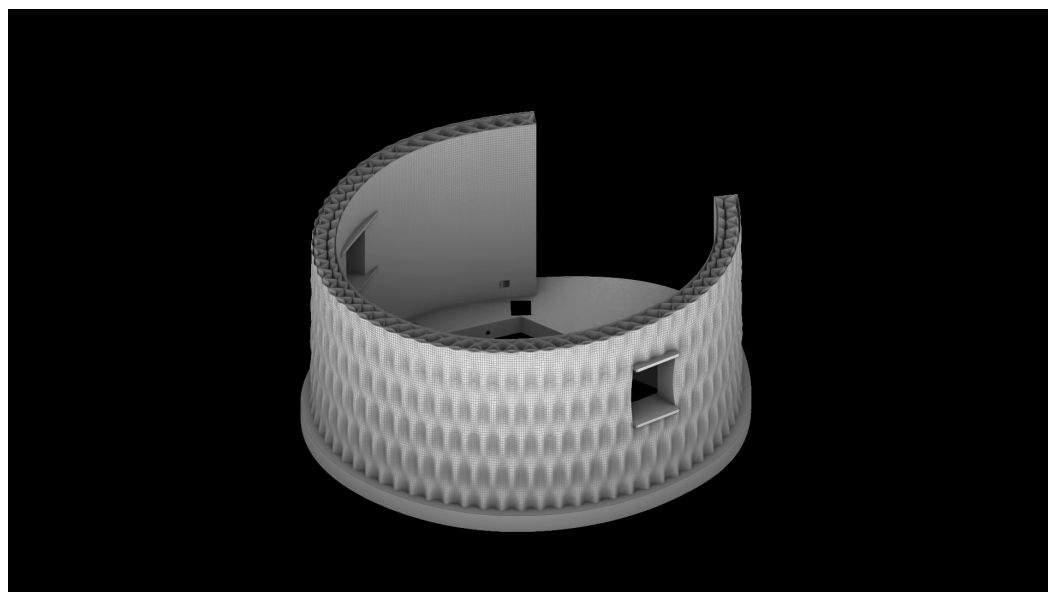

**Video S2.** Gaia | 3D printed earth house with Crane WASP | Presentation Video;  
<https://www.youtube.com/watch?app=desktop&v=KPaOCWrZJ94> [source WASP].

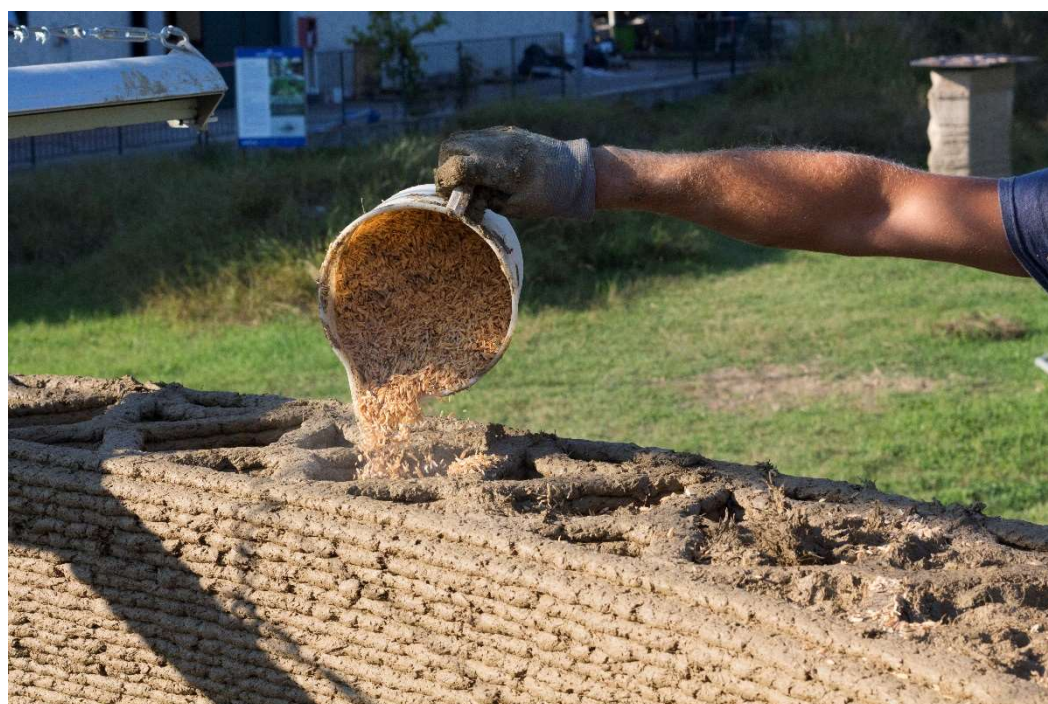

**Figure S4.** Filling of Gaia's honeycomb structure with rice husk [source WASP].

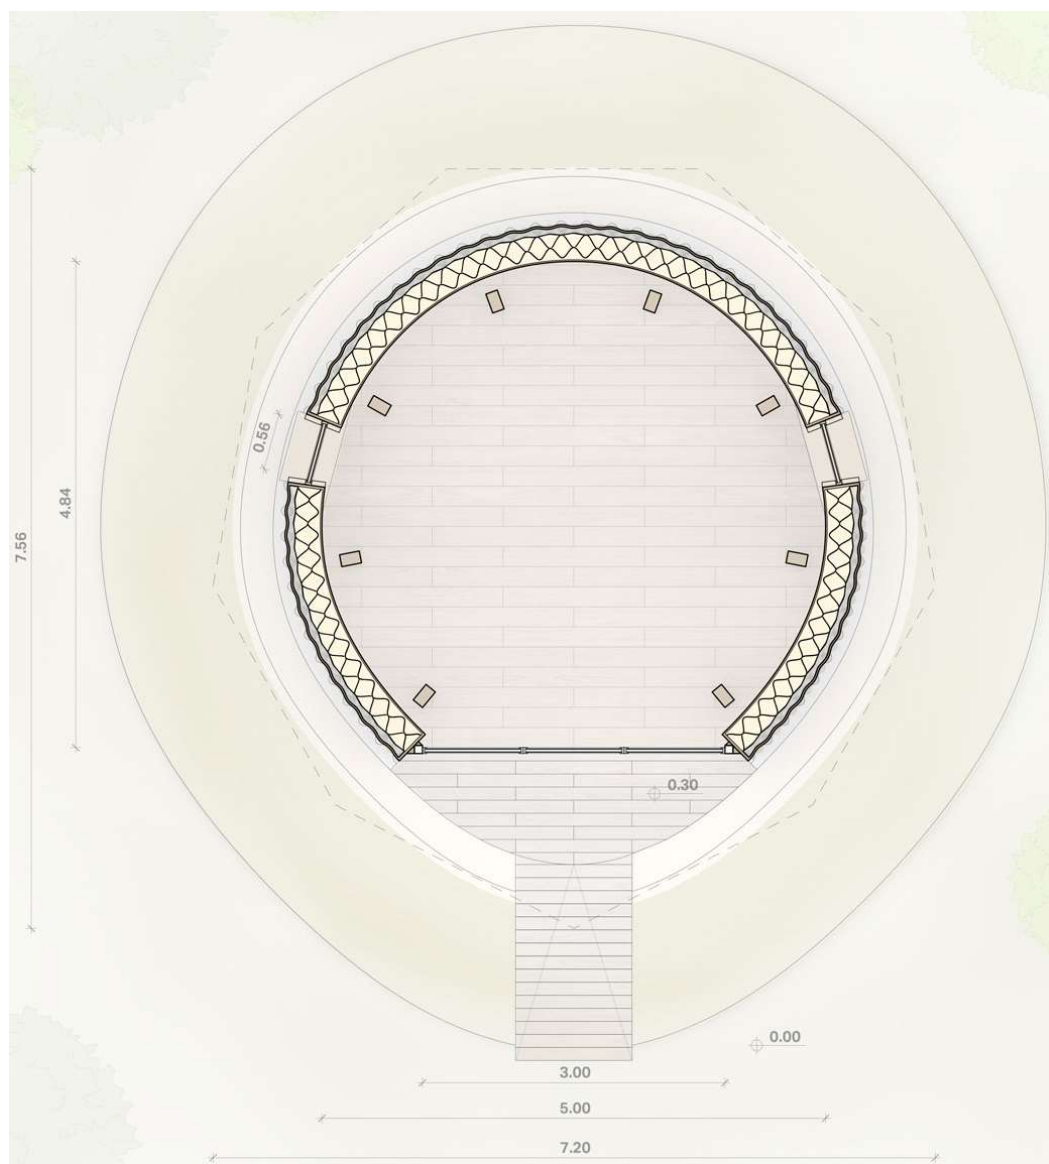

**Figure S5.** Floorplan of Gaia [source WASP].

23

24



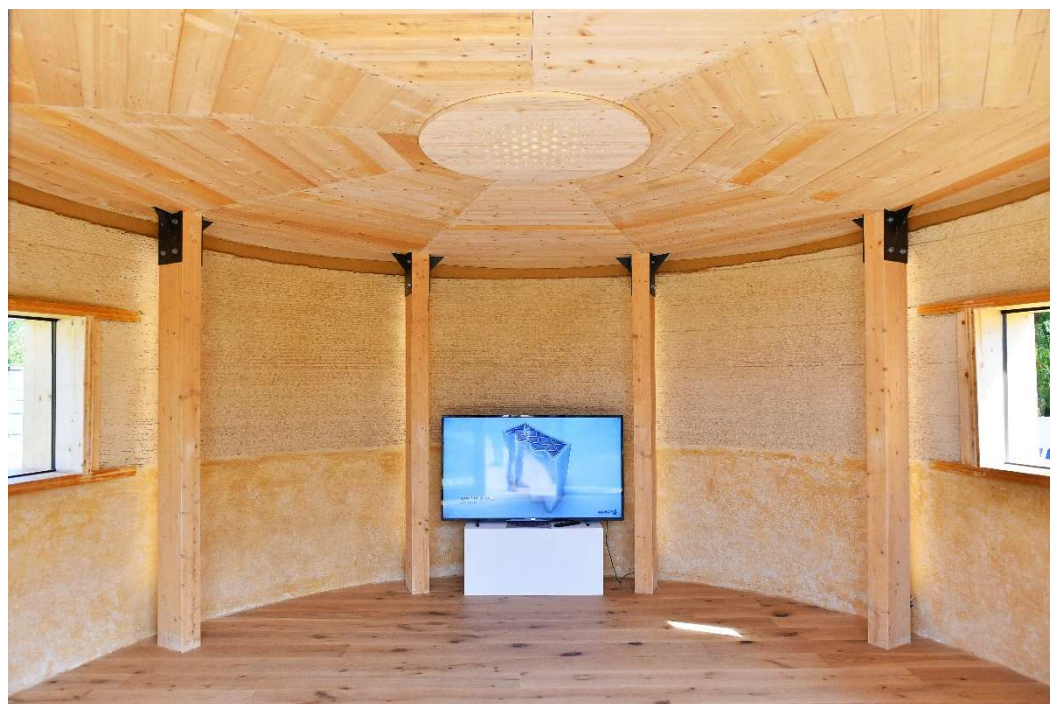

**Figure S6.** Four of the eight wooden pillars that sustain Gaia's roof [source WASP].

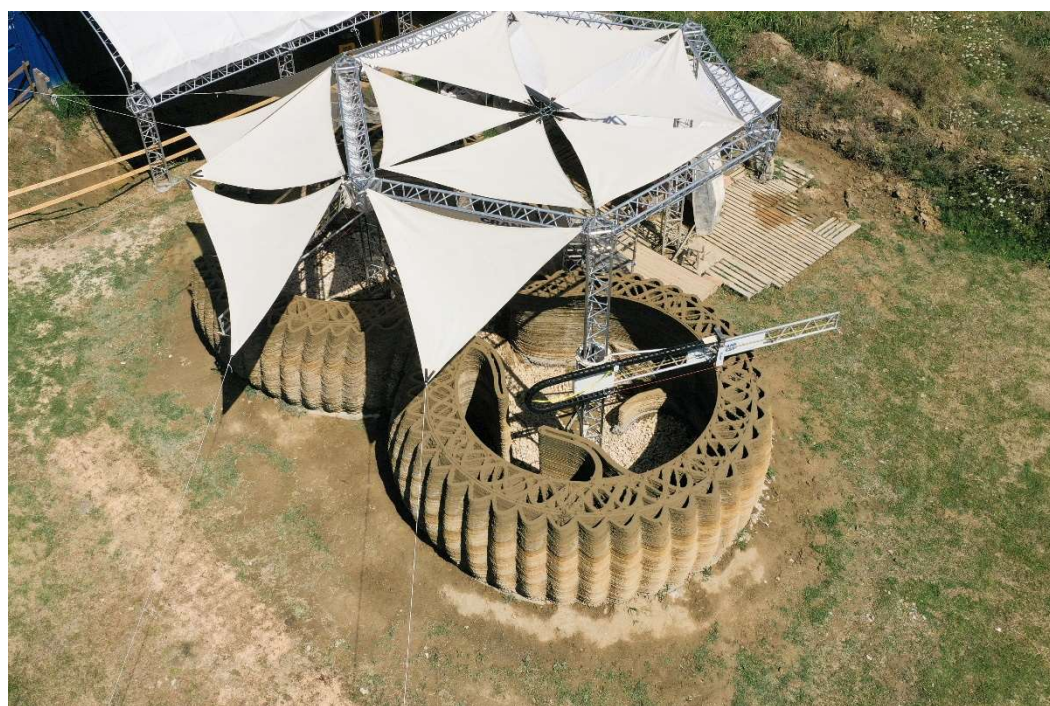

**Figure S7.** Tecla's honeycomb structure [source WASP].



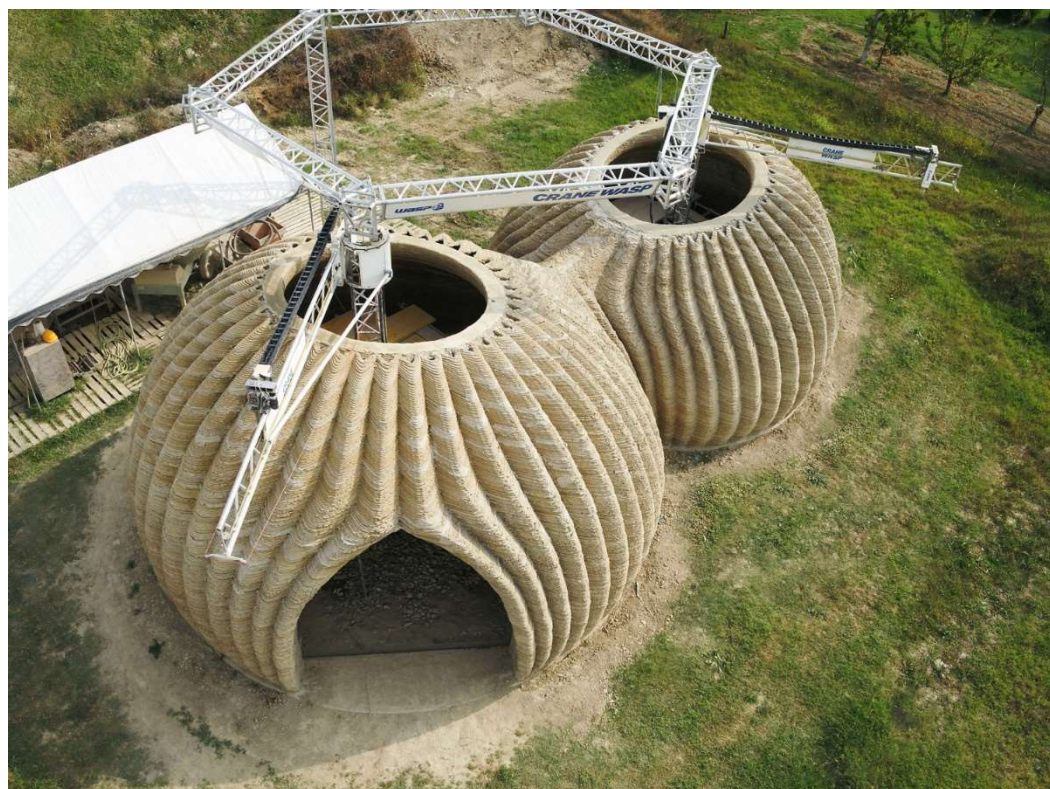

**Figure S8.** The two domes of Tecla in an advanced stage of completion [source WASP].

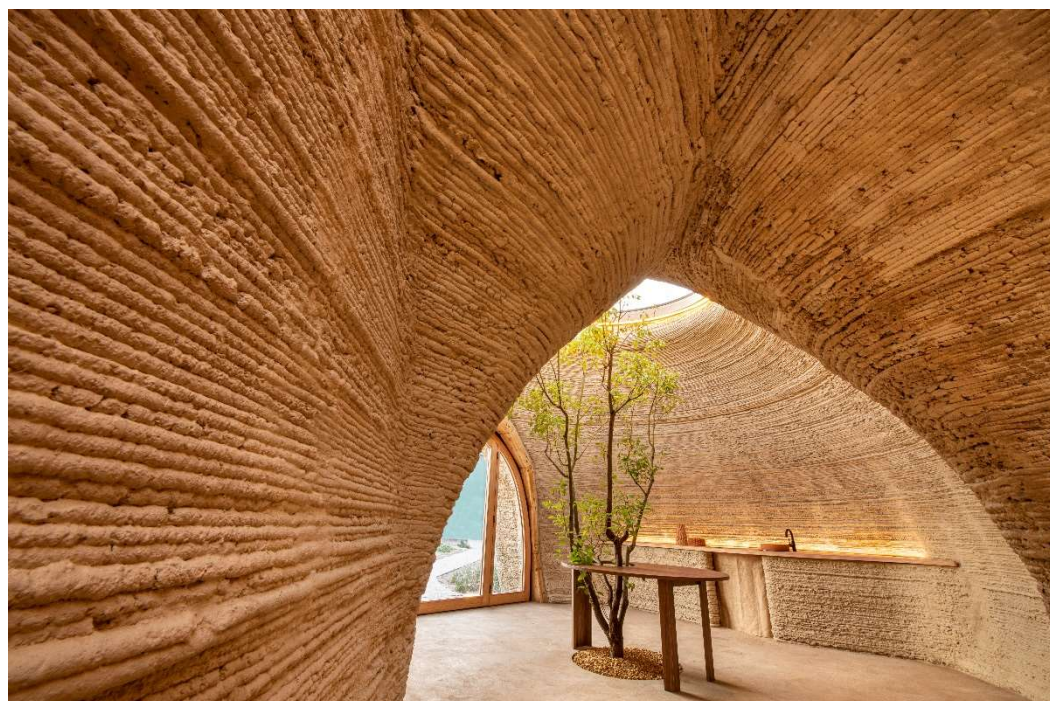

**Figure S9.** Some of Tecla's interior furnishings [photo taken by Iago Corazza].

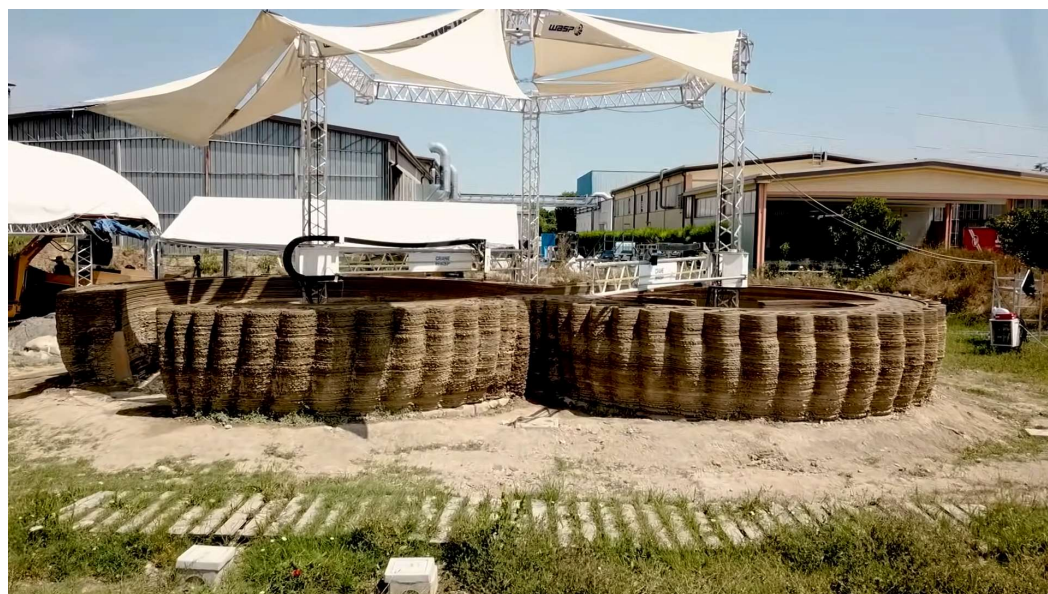

**Video S3.** Eco-sustainable 3D printed house – Tecla; <https://www.youtube.com/watch?app=desktop&v=w9sXqxccRPM&feature=youtu.be> [source WASP].

36

37

38

39
