# Supplementary material for: Rice Husk Shredding as a Means of Increasing the Long-Term Mechanical Properties of Earthen Mixtures for 3D Printing
Source: Preprints.org preprint supplement (doi:10.20944/preprints202112.0360.v1), 2021-12-22
Supplement: Supplementary file 2 [file supplementary]

# Rice Husk Shredding as a Means of Increasing the Long-Term Mechanical Properties of Earthen Mixtures for 3D Printing

Elena Ferretti <sup>1,\*</sup>, Massimo Moretti <sup>2</sup>, Alberto Chiusoli <sup>2</sup>, Lapo Naldoni <sup>2</sup>, Francesco De Fabritiis <sup>2</sup> and Massimo Visonà <sup>2</sup>

<sup>1</sup> Department of Civil, Environmental and Materials Engineering—DICAM, Alma Mater Studiorum University of Bologna, Viale del Risorgimento 2, 40136 Bologna (BO), Italy; elena.ferretti2@unibo.it

<sup>2</sup> WASP s.r.l., Via Castelletto 104/106, 48024 Massa Lombarda (RA), Italy; alberto@3dwasp.com

\* Correspondence: elena.ferretti2@unibo.it; Tel.: +39-051-209-35-15

**Abstract:** This paper is part of a study of earthen mixtures for 3D printing of buildings. To meet the ever-growing environmental needs, the focus of the paper is on a particular type of bio-composite for the stabilization of earthen mixtures – the rice husk-lime bio-composite – and on how to enhance its effect on the long-term mechanical properties of the hardened product. Having assumed that the shredding of the vegetable fiber is precisely one of the possible ways to improve the mechanical properties, we compared the results of uniaxial compression tests performed on cubic specimens made with both shredded and raw vegetable fiber, for three curing periods. The results showed that the hardened earthen mixture is not a brittle material in the strict sense, because it exhibits some peculiar behaviors, anomalous for a brittle material. However, being a “designable” material, its properties can be varied with a certain flexibility to get as close as possible to the desired ones. One of the peculiar properties of the hardened earthen mixture deserves further investigation, rather than corrections. This is the vulcanization that occurs (in a completely natural way) in the long term, thanks to the mineralization of the vegetable fiber by carbonation of the lime.

**Keywords:** earthen buildings; 3D printing; bio-composites; aging; mechanical properties; lime carbonation; vulcanization

**Citation:** Lastname, F.; Lastname, F.; Lastname, F. Title. *Materials* **2021**, *14*, x. <https://doi.org/10.3390/xxxxx>

Academic Editor: Firstname Lastname

Received: date  
Accepted: date  
Published: date

**Publisher’s Note:** MDPI stays neutral with regard to jurisdictional claims in published maps and institutional affiliations.

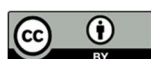

**Copyright:** © 2021 by the authors. Submitted for possible open access publication under the terms and conditions of the Creative Commons Attribution (CC BY) license (<https://creativecommons.org/licenses/by/4.0/>).

## 1 Introduction

The latest challenge in using raw earth for construction purposes is the additive manufacturing (3D printing) of entire housing modules. Of the three traditional earthen construction techniques – namely, adobe (or compressed earth blocks), rammed earth and cob (Sections 1.1, 1.2) – cob is the most similar to 3D printing of earthen buildings. One can actually see the 3D printing of earthen housing modules as the automated version of the manual cob technique.

Like cob, 3D printing does not require the use of formwork, which leads to numerous environmental benefits [1,2]. Additionally, both cob and 3D printing use a mixture consisting of subsoil (earth), water and fibrous material. Both the preparation and the use of the fresh mixture take place on site, which makes these techniques in-situ-based earthen construction techniques. The similarities between the two construction techniques allow for the transfer of vernacular knowledge and cob construction practices to additive manufacturing, resulting in increased sustainability potential for applications in construction compared to concrete-based 3D printing techniques [3].

Unlike cob, however, the printing process of earthen materials is very sensitive to the mixture, which is one of the main limiting factors in the development of large-scale 3D printing of earthen buildings [4]. For example, the rheological behavior of the mixture must allow for smooth extrusion through the 3D printing system [4,5], despite the irregular particle size of the mixture and the addition of organic material. According to [6], the

basic criteria that, if met, guarantee a successful 3D printing process are actually three: extrudability, buildability and workability with time.

In principle, the use of finer portions of organic material facilitates the extrusion process. Since fine portions of organic material also allow for faster mineralization than portions of greater particle size (Section 2), the purpose of the experimental campaign presented in the following Sections is to verify whether the shredding of the rice husk – the vegetable fiber of the mixture – improves the mechanical properties of earthen mixtures, as well as their workability. To this end, we performed uniaxial compression tests on cubic specimens made with shredded rice husk and compared the results with those of cubic specimens made with non-shredded rice husk, all components and dosages being equal (Section 3.1). Since the experimental campaign is the result of a long period of study of traditional earthen construction techniques, on the one hand, and of the physical-mechanical properties of earthen mixtures for manual construction and 3D printing, on the other hand, this introductory Section includes several sub-Sections to provide a comprehensive overview of the knowledge and motivations behind the experimental campaign.

The compression tests took place at 90, 180 and 450 days of curing (Section 3.1), in order to verify how the mechanical properties vary over time. The relatively long observation period – rather rare in the scientific literature as far as the study of earthen materials is concerned – allowed us to highlight some unexpected trends over time in stiffness and behavior under cyclic loads. In particular, the effect of carbonation on earthen mixtures seems to have characteristics similar to those of the vulcanization of natural rubber (Section 4.2). This unexpected result, never highlighted in previous experimental campaigns, can have several interesting repercussions on the technical practice of 3D printing of earthen materials for construction purposes, if confirmed over longer periods of observation.

### 1.1 The Use of Raw Earth in Traditional Construction Techniques

Earthen construction (i.e. the construction of structural units manufactured from soil) is a vernacular solution that developed over many thousands of years in all inhabited continents of the world. The earth is indeed the oldest and most abundant of the construction resources. Being also cost-free, it had a particular development in rural regions or where other traditional materials, such as timber and stone, are not available or affordable. This gave rise to many different and varied forms of construction techniques and applications from the earliest known use of sun-dried compressed earth blocks (adobe blocks) in Jericho, Palestine (9000 BC) onwards. The varied use of earthen construction resulted in earth playing a much wider and arguably more significant role as a building material than concrete over the course of human civilization.

Whilst often synonymous with primitive or nomadic architecture and incorrectly associated with poverty and vulnerability [7], earthen construction can also apply to certain types or architecture in developed countries and urban societies. Furthermore, the use of earthen constructions does not only concern the dawn of civilization, in the distant past. In fact, it has returned to be a topical issue starting from the early part of the twentieth century, driven by a growing interest in earthen materials in the field of pavement geotechnics [8]. The decisive push towards the modern development of earthen constructions came shortly after and originates in the need to preserve some historical sites that come down to us thanks to the ability of the compact earth to resist for centuries [9]. Additionally, materials professionals and researchers looking for lower-energy (and carbon dioxide) alternatives have increasingly returned to earthen construction since the 1970s. Indeed, earthen structures are sustainable forms of construction due to their characteristic low carbon footprint, which means they require lower carbon emissions for construction [10]. Moreover, earthen materials have less embodied energy than fired bricks or concrete, which means they need a fraction of the energy required to manufacture and process an equivalent amount of fired bricks or concrete. In the specific case of cement concrete, this fraction is of the order of 1% [11]. At the scale of the building, this means that the energy

embedded in earthen buildings is between 30% [12] and 50% [13] less than traditional brick cavity walls and reinforced concrete structures. Earthen buildings are also energy efficient, thanks to the synergy between thermal conductivity and hygroscopic properties of earthen materials [14]. This allows earthen buildings to consume less operational energy than conventional structures. Finally, since the earthen materials have undergone the slightest modification during construction, they need less energy to recycle them [15].

Due to the renewed interest in recent times, scientific articles about earthen construction now appear regularly in leading international journals [16]. Most of them relate to how factors such as particle size distributions, gravel content, sand content, silt and clay content (content of fine fractions), water content, stabilizer content, density and compaction define the strength characteristics of an earthen material [7,17–26]. Some researchers also investigated the plasticity and shrinkage properties of the earthen construction material. In particular, [27] studied how the chemical composition of clay particles allows the particles to interact with the environment to attract moisture to their surfaces, modifying the hygroscopic behavior of the earthen material. [28] focused on how the drying/wetting cycles due to environmental conditions lead to the reduction of strength and stiffness as a result of the shrinkage/swelling of the clays within the earthen material. Other studies dealt specifically with the earthen construction techniques. For example, [18] recommended the range of soil plasticity for unstabilized rammed earth (layers of damp earth compacted between formworks and left to dry once the formworks have been removed) and compressed earth blocks. For concrete stabilized earthen materials, the analysis on the recommended range of soil plasticity was also performed separately for rammed earth [18,29–31] and compressed earth blocks [20,32,33]. Some researchers provided grain size recommendations of unstabilized earthen materials for use in rammed earth [18,34–38] and compressed earth blocks [18,35–37], while other researchers dealt with the grain size recommendations of stabilized earthen materials for use in rammed earth [29,31,39,40] and compressed earth blocks [8,20,32,33,38,41–45]. [46,47] conducted detailed studies on the classification of soils suitable for rammed earth construction, based on soil grain size, plasticity and shrinkage properties. Several research studies documented the role of different stabilizers in the preparation of Compressed Stabilized Earth Blocks (CSEBs) with improved strength and durability performance [8,18,32,42,43,48,49] and identified the optimal stabilizer content for CSEBs [18,32,33,43,50–52]. As far as durability is concerned, several tests simulated rain-induced erosion and deterioration from capillary rising [53,54]. Moreover, [20] studied the durability characteristics of cement stabilized earth blocks with different plasticity properties, [55] investigated the performance of stabilized (with cement and/or lime) compressed blocks under both laboratory and climatic conditions exposure, [56] focused on the durability characteristics of rammed earth walls that have been exposed to natural atmospheric agents for 20 years, [57] compared strength and durability properties of 32-year-old cement stabilized rammed earth (CSRE) and 28-day-old rammed earth specimens, [58] investigated the effect of stabilizers other than cement on the mechanical and durability properties of hyper-compacted earthen materials. Finally, the most recent studies concern the hygroscopic behavior of earthen construction materials [27,59–62], which determines indoor air quality and humidity levels.

## 1.2 The Problem of Soil Stabilization in Earthen Construction

The raw material for earthen construction is subsoil, locally sourced and mixed with water and, occasionally, other materials such as straw or animal dung. The inclusion of straw or organic compounds stabilizes the earthen structures, as well as improving their durability and ensuring their longevity.

Both the compressive and tensile strengths of the subsoil mixed with water (without the addition of other components) are relatively low, compared to many materials of the industrial age. To give an order of magnitude, the uniaxial compressive strength of a soil mixture is generally less than 5 MPa and often less than 1 MPa, while the uniaxial tensile strength is so low that it is often ignored in design. Therefore, in order to withstand the

vertical and lateral loads imposed on them, the earthen structures must be massive, that is, they must have relatively thick walls. Since massive constructions are very expensive, earthen structures are not competitive in modern construction. To be precise, to compete with conventional fired bricks, the wet compressive strength of earthen blocks should be between 1.5 and 3.5 MPa and the minimum compressive strength required for one-story external walls of 300 mm thickness of rammed earth is 2 MPa. This led to the need to increase the mechanical properties of earthen structures by means of the soil stabilization technique [18,32,33,42,43,48,49,50–52,63].

One of the oldest remedies to stabilize earthen structures is the use of natural fibers (straw). This is the case of the cob, a traditional form of wall building consisting of successive layers of clay soil mixed with straw, stacked and molded in situ, generally without the need for formworks. The addition of vegetable fibers such as straw reduces moisture movement and cracking of earthen constructions [64]. Recent experimental studies [65] have shown that embedded fiber length and moisture content are indeed important factors for improved strength. Additional remedies to improve the mechanical properties of the soil in historical earthen structures are mechanical tamping and biomaterial additions in the form of egg whites or proteins [66–68].

The plural term Bio-stabilizers is the cumulative name given to the biological products suitable for improving the properties of the soil and soil bio-stabilization is the set of corresponding biological processes. Over the past century, industrial stabilizers like lime and Portland cement replaced the bio-stabilizers as additives to improve the strength and durability of earthen products, as well as also controlling moisture movements. However, adding cement affects sustainability [68], as it leads to an increase in embodied energy, carbon footprint and operational energy and reduces the potential for recyclability [15,69,70]. For example, earthen materials stabilized with 9% cement have a carbon footprint equivalent to that of a fired brick or weak concrete [71]. Furthermore, since cement-stabilized earthen materials require an energy-intensive (non-economical) process to be fully recycled, they are usually downcycled – which, in turn, is energy-expensive – or dumped into a landfill for construction waste [15]. Cement stabilization also involves a drastic reduction in the hygroscopic behavior of the stabilized rammed earth, which controls the indoor comfort and has a direct impact on air-conditioning [27,62]. On the other hand, as far as embodied energy is concerned, the cumulative energy demand of compressed stabilized earthen blocks is nearly half that of traditional fired bricks [15].

To prevent chemical stabilizers from deteriorating the ecological credentials of earthen materials, some researchers proposed the use of microbial induced calcite precipitation (MICP) [72–74] and biopolymers [75–86] as potential alternatives to energy-intensive and  $CO_2$  producing stabilizers [87]. This led to a renewed interest in bio-stabilization techniques.

Both MICP and biopolymer stabilization are techniques of Bio-cementation, which is one of the eight soil bio-stabilization categories [88], namely:

- Bio-aggregation: increasing the effective size of the soil particles to reduce soil erosion and dust emission;
- Bio-crusting: formation of a crust on the soil surface to resist wind and water erosions and to reduce dust emission and water erosion;
- Bio-coating: formation of a layer on the soil surface in order to improve colonization, aesthetics, or resistance to corrosion;
- Bio-clogging: filling the soil pores or rock cracks to reduce the permeability of the material;
- Bio-cementation: binding the soil particles to increase shear strength;
- Bio-desaturation: production of biogas bubbles in situ to reduce saturation and liquefaction potential of the soil;
- Bio-encapsulation: increasing strength by encapsulating certain soil particles, such as soft clay, loose sand, quick sand and muck soil;
- Bio-remediation: bio-degradation of soil pollutants in contaminated soils.

Bio-cementation is in fact the most suitable category of bio-stabilization to replace chemical stabilizers in earthen construction materials.

Among the natural materials suitable for increasing the mechanical properties of earthen buildings, rice husk (RH) plays an important role due to its high silica content and low alumina content. The most common use of RH is in the form of rice husk ash (RHA), which has a silica content between 85% and 95% and an alumina content between 0.5% and 2%. Adding some RHA increases the silica/alumina (Si/Al) ratio of geo-polymeric binders, which leads to higher compressive strength [89,90]. It is worth noting, however, that the Si/Al ratio has an upper limit, beyond which a further increase in the Si/Al ratio leads to a decrease in compressive strength of geo-polymeric binders [91,92]. Indeed, an excess of silicate hinders the evaporation of water and the formation of silicon-oxygen-silicon bridge bonds (Si-O-Si bonds) during the geo-polymerization process [93].

### 1.3 Additive Manufacturing of Earthen Buildings

One of the pioneering companies in the production of 3D printers for earthen structures is the Italian WASP (acronym for World's Advanced Saving Project), whose goal is to build transportable and energy-efficient 3D printers for zero-kilometer houses. The first success of the WASP in this sense came in 2015 with the construction of BigDelta (Figure S1), a 12 m high 3D printer for the on-site construction of earthen houses [94,95]. The BigDelta requires only one hour of three-person work to assemble and a few meters of solar panels to power. In 2018, WASP abandoned the idea of a giant 3D printer in favor of a modular collaborative 3D printing system (Crane WASP, Figure S2, Video S1) that reinterprets classic building construction cranes from a digital manufacturing perspective. This allowed WASP to create Gaia (Figure S3, Video S2), a 30 square meter prototype made up of a 40 cm thick circular envelope (Figure S2). Gaia required 100 hours of printing (in 2018). Based on Gaia's experimented data, it is possible to imagine new economic scenarios, in which one hectare of cultivated paddy field is able to produce 100 square meters of built area. Thanks to the honeycomb structure of the envelope, with rice husk that fills the cavities close to the inner wall of the envelope (Figures S2, S4), Gaia does not need either heating or air conditioning, as it maintains a mild and comfortable indoor temperature in both winter and summer. The limit of the envelope of Gaia consists in not being load bearing. In fact, eight wooden pillars support the flat roof (Figures S5, S6), also made of wood and equipped with lime and rice husk insulation. This limit has been overcome thanks to the collaboration between WASP and Mario Cucinella Architects, which resulted in the double dome structure of Tecla – Technology and Clay (Figures S7, S8), the first 3D printed eco-sustainable house model made entirely in local raw earth (completed in 2021 in Massa Lombarda, Italy) [96]. The double dome solution made it possible to cover the roles of structure, roofing and external cladding at the same time, also including the 3D printing of some interior furnishings (Figure S9). TECLA is the first housing module made using two Crane WASP collaborative printers at the same time (Video S3). WASP also developed the software capable of synchronizing the two extruder-arms, in order to avoid collisions and guarantee simultaneous operation.

With Gaia and Tecla prototypes, WASP undertook two different lines of research. The first line of research deals with the 3D printing of infill walls using natural mixtures of local origin without any type of chemical stabilization (Gaia). The second line of research aims at the 3D printing of load-bearing elements by additivating the mixtures with the minimum quantity of hydraulic lime-based stabilizers, which allows for the creation of a new circular building model entirely made with reusable and recyclable materials.

## 2 The Idea Behind the Experimental Campaign

The experimental research on earthen mixtures for additive printing (Section 1.3) was born by combining the results on the use of silica in geo-polymeric binders, the bio-cementing capacity of bio-stabilizers and the construction technique of the cob (Section 1.2),

which consists in arranging a moist mixture of earth and straw in layers to form a structure in-situ. As in the cob, the vegetable fiber of the experimentation (in our case, the rice husk) is in the natural state, avoiding the reduction to the state of ash by combustion. Thanks to its high silica content, the rice husk (RH), used together with lime, forms a natural bio-composite capable of improving the mechanical properties of earthen mixtures through Bio-cementation (Section 1.2). In particular, the lime suitable for use in combination with RH – as well as with any other vegetable fiber – is aerial lime (which hardens in air), not hydraulic lime (which also hardens in water). While the reaction of the hydraulic lime ends when the lime loses its water content, the reaction of the aerial lime begins just when it loses water and continues indefinitely (hardening progresses slowly). This allows the Bio-cementation effect of the bio-composite to have an unlimited action over time, contributing more and more over time to the strength of the structure. The use of aerial lime also allows the bio-composite to manage air humidity very well.

The combination of a vegetable fiber with a mineral (in our case, aerial lime) and the water allows the vegetable fiber to mineralize and become resistant to bacteria, molds, insects, rodents and fire, resulting in very durable materials. In the specific case of aerial lime, the mineralization of the fiber occurs during the carbonation process shown in Figure 1. The product of lime carbonation is calcium carbonate ( $\text{CaCO}_3$ ), a salt that is also the main component of the rock used to produce aerial lime (limestone). This closes the so-called lime cycle (Figure 1), which starts from calcium carbonate – transformed into calcium oxide (quicklime), then into calcium hydroxide (hydrated lime, or slaked lime) – and ends, in contact with the carbon dioxide of the air (carbonation), again in calcium carbonate.

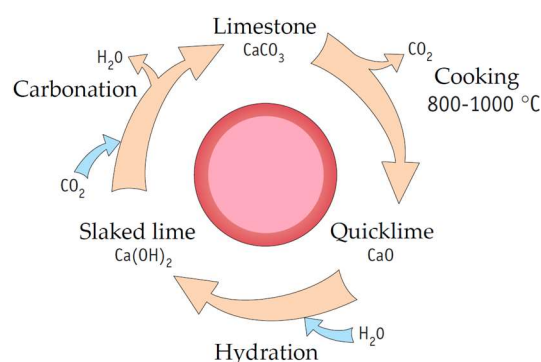

**Figure 1.** The lime cycle: (1) cooking calcium carbonate ( $\text{CaCO}_3$ ) at 800-1000 °C (process known as calcination) produces quicklime, namely calcium oxide ( $\text{CaO}$ ), with the release of carbon dioxide ( $\text{CO}_2$ ); (2) the reaction of quicklime with water (hydration) causes a violent release of heat and the transformation of calcium oxide into calcium hydroxide ( $\text{Ca(OH)}_2$ ), called hydrated lime or slaked lime, suitable for use in construction; (3) the prolonged contact of the slaked lime with the carbon dioxide contained in the air triggers a carbonation reaction that transforms the calcium hydroxide into calcite (calcium carbonate), with the release of water.

The production of calcium carbonate that follows from the carbonation of lime over time is an effect somewhat similar to the delayed precipitation of calcium carbonate that takes place in the MICP (Section 1.2), due to the metabolic action of bacteria (also unlimited in time). The presence of calcium carbonate at the end of the lime cycle is the reason for the increased mechanical properties of earthen buildings made with a little lime in the mixture. In fact, the calcium carbonate crystals produced by carbonation have a good power of adhesion both to each other and to the other elements in the mixture, which results in the cementing cause of the hardened product.

Thanks to the cyclic structure of the lime transformation process, the RH-lime bio-composite respects the environment. If it were necessary to demolish an earthen building made with RH-lime bio-composite, the calcium carbonate would be completely recyclable

and reusable in new earthen mixtures. Alternatively, as it does not contain industrial chemicals, it could remain dispersed on the ground without causing soil contamination.

Similarly to what [97] did to increase pozzolanic activity in geo-polymers, the idea behind the experimental campaign discussed in the following Sections is to make the most of the cementing capacity of the bio-composite by shredding the RH. In fact, all other conditions being equal (including the quantity of RH), shredding will increase the contact surface between the RH and the earthen matrix, favoring the formation of Si-O-Si bonds.

The use of RH in earthen mixtures for additive printing paves the way for new technological applications that help reduce one of the most serious environmental hazards. In fact, every year rice cultivation produces a large volume of RH (from 20% to 25% by weight of the rice crop), which is used only to a small extent [98], despite being a good source of renewable energy [99]. Most of the RH goes to increase the mass of organic waste and undergoes disposal in landfills or through open combustion [100]. Both actions are harmful to the environment: landfilling may potentially pollute the soil and water; burning outdoors increases the amount of carbon dioxide in the atmosphere, thus contributing to global warming.

### 3 Materials and Methods

#### 3.1 The two Earthen Mixtures of the Experimental Program

In the spirit of the idea behind this experimental program (Section 2), the two mixtures under study differ only in the particle size of the vegetable fiber, which is the RH. In particular, the mixture named as TQ mix contains unaltered RH, while the mixture named as LT mix contains shredded RH (Figure 2).

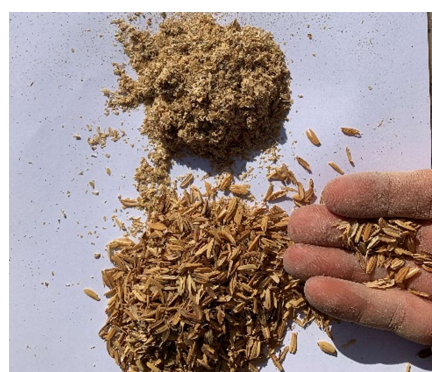

**Figure 2.** The two types of RH used in the experimental program, arranged with decreasing particle size from bottom to top: unaltered RH (maximum size variable from 6 to 8 mm) and shredded RH (maximum size: 2 mm).

The mix design of the experimental program is the result of many years of research on earthen mixtures suitable for 3D printing of buildings [101]. The preparation of the mixtures and specimens took place at the WASP headquarters (Massa Lombarda, Italy, Section 1.3). The TQ and LT mixes have the composition by weight shown in Table 1, where:

- The soil is of local origin, as it is the soil collected on site at the WASP headquarters. From the analysis of a soil sample, it emerged that the composition of the soil consists of 30% clay, 40% silt and 30% sand. Furthermore, the organic content of the soil (calculated according to ASTM D2974: 2000 directives) is 3.7%. According to UNI 10006: 2002 for the classification of soils, this composition corresponds to a soil of class A4, that is, a calcareous loam. Its optimum dry density is  $1815 \text{ kg/m}^3$  (EN13286-2: 2005).
- The lime-based binder is a high performance fiber-reinforced powder stabilizer with hydraulic action for the treatment and consolidation of soils and recycled or first-use



aggregates. Its composition includes hydraulic lime for 25–50% and hydrated lime (Section 2) for 20–25%. The presence of specially selected mineral additions with pozzolanic activity (not deriving from the use of cement) and having binding properties (> 22% by weight) significantly increases the durability of the hardened mixture as well as the resistance to leaching of the stabilized material. In addition, the polypropylene fibers present in the product (dosage  $\geq 0.1\%$ ), although with an aspect ratio greater than 600, are easily dispersed in the mixture and improve the final mechanical performance of the treated soil.

- Both the hydraulic lime contained in the lime-based binder and the one added separately have the function of allowing the carbonation to begin when the mixtures are still in their fresh state, which reduces setting time. In fact, since the aerial lime hardens in contact with the  $CO_2$  contained in the air (Section 2), in the absence of hydraulic lime the carbonation would begin only after the drying of the mixtures. Having a carbonation that begins immediately after mixing with water is instead mandatory to meet buildability, which is the second requirement in 3D printing (Section 1). To this end, each printed layer must be strong enough to withstand the weight of subsequent layers before hardening and achieving some degree of structural integrity [102]. When the mixtures dry, the hydraulic lime exhausts its function and the carbonation continues thanks to the fraction of aerial lime.
- The (wet) silica sand added to that already contained in the soil has fluvial origin. Its grain size is between 0.00 and 0.60 mm.

**Table 1.** Percentage composition by weight of the TQ and LT mixes.

| Component           | TQ mix | LT mix |
|---------------------|--------|--------|
| Soil                | 70.42% | 70.42% |
| Lime-based binder   | 4.70%  | 4.70%  |
| Hydraulic lime      | 4.69%  | 4.69%  |
| Unaltered rice husk | 1.41%  | /      |
| Shredded rice husk  | /      | 1.41%  |
| Silica sand         | 18.78% | 18.78% |

The kneading of the two mixtures took place by means of the muller, capable of making the compounds homogeneous and workable.

In this work, we will not carry out specific tests to verify the extrudability, buildability and workability of the mixtures of the experimental program, since these are topics of previous works. Instead, we will present the results on the trend over time of the mechanical properties of the two hardened mixtures subjected to uniaxial compression load.

The specimens subjected to the load test (Table 2) have a cubic shape (Figure 3), with a side of 150 mm. Since printability is not the subject of this work, the production of the specimens did not make use of mechanical extrusion but of manual compaction inside cubic formworks (Figure 3(a)). After the removal of the formworks (Figure 3(b)), curing took place under controlled conditions of temperature and humidity. Both the TQ and the LT specimens showed shrinkage of approximately 5 mm per edge (Figure 4), when completely dry. To be precise, the average (negative) percentage variation in linear dimensions due to shrinkage was 2.44%.

We subjected the 18 specimens of the experimental program – 9 for each mixture (Table 2) – to uniaxial compression tests in groups of three, at 90, 180 and 450 days of curing (the casting of all specimens took place on the same day). Section 4 will show the results of the uniaxial compression tests, averaged over the three different curing periods. A subsequent paper [103] will show the results of the compression test on a 3D printed wall segment made with the LT mix. To allow comparison of the experimental results, the 3D printing of the wall segment took place on the same day and with the same mixture as



the casting of the LT cubic specimens (the earthen wall segment is partially visible in Figure 3, behind the cubic specimens).

**Table 2.** List of the specimens of the experimental program, net of discarded specimens.

| Specimen label | Type of mixture | Curing days |
|----------------|-----------------|-------------|
| TQ1            | TQ mix          | 90          |
| TQ2            | TQ mix          | 90          |
| TQ3            | TQ mix          | 90          |
| TQ4            | TQ mix          | 180         |
| TQ5            | TQ mix          | 180         |
| TQ6            | TQ mix          | 180         |
| TQ7            | TQ mix          | 450         |
| TQ8            | TQ mix          | 450         |
| TQ9            | TQ mix          | 450         |
| LT1            | LT mix          | 90          |
| LT2            | LT mix          | 90          |
| LT3            | LT mix          | 90          |
| LT4            | LT mix          | 180         |
| LT5            | LT mix          | 180         |
| LT6            | LT mix          | 180         |
| LT10           | LT mix          | 450         |
| LT11           | LT mix          | 450         |
| LT12           | LT mix          | 450         |

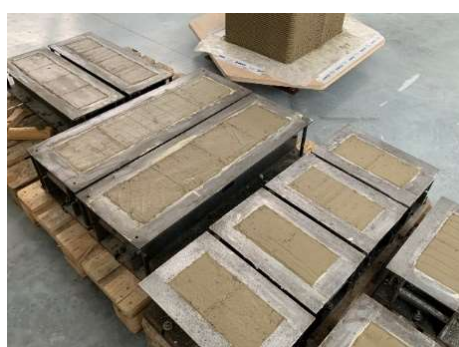

(a)

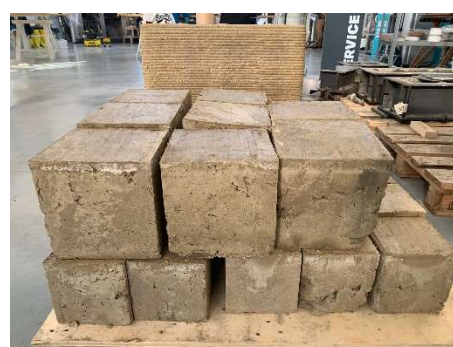

(b)

**Figure 3.** Preparation of the specimens: (a) The specimens after casting in the formworks; (b) Appearance of the specimens upon removal of the formworks (before the selection that led to the exclusion of some specimens).

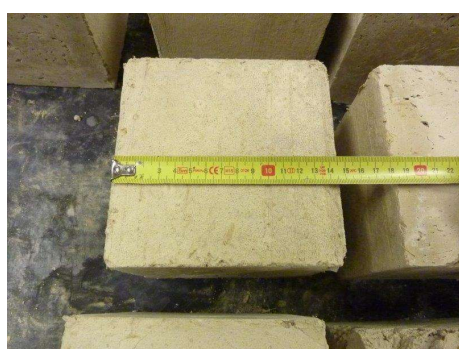

(a)

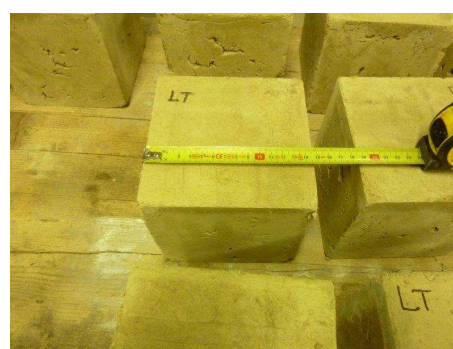

(b)

**Figure 4.** Dimensional check after drying: (a) TQ specimens; (b) LT specimens.

### 3.2 Test Setup

As with concrete and masonry units, the most commonly used parameter to evaluate the performance of an earthen construction material is the compressive strength [22,42,104,105], which is the maximum stress value a material can withstand when subjected to uniaxial compression. Routine tests to determine the compressive strength of an earthen construction material are direct unit strength tests, RILEM (1994) tests, or indirect tests [22]. It is worth noting, however, that the choice of the testing procedure affects the test results, making it impossible to obtain a unique compressive strength value. Therefore, similarly to what happens with concrete and masonry specimens [106–109], the compressive strength of an earthen construction material requires an adequate identification procedure [22]. Furthermore, the compressive strength of an earthen construction material depends on the geometry of the specimen (cylinder, prism or cube), the dimensions and the aspect ratios [22,104,105]. In short, the earthen construction material suffers from the shape-effect, well-known behavior of brittle materials (in general) and of concrete [110] (in particular). The shape-effect also affects the branch beyond the load peak (softening branch), under both static [107,111] and dynamic [112] load conditions. Correct evaluation of the shape-effect is also a major concern in modeling earthen construction material, as with all brittle (heterogeneous) materials [113,114].

In the specific case of the TQ and LT specimens, the shape-effect did not generate any problems in comparing the experimental data, since the fresh samples were all of the same shape, dimension and aspect ratio. However, a further geometric effect had a decisive influence on the results of these experimental tests: the geometric imperfection induced by shrinkage during the drying phase (Figure 4).

The test method chosen to determine the compressive strength of the TQ and LT specimens is the uniaxial compression test (Figure 5), conducted in the displacement control mode at the LiSG laboratory of the University of Bologna.

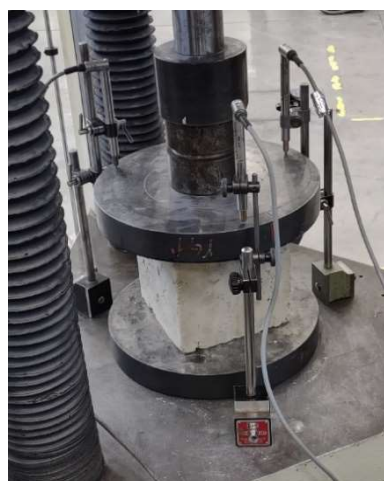

**Figure 5.** Placement of the three LVDTs on the bottom plate of the testing machine.

In order to reduce the effect of geometric imperfections on the experimental data, we acquired the vertical displacements of the upper faces of the specimens with three LVDTs (Linear Variable Differential Transformers), positioned radially at 120° on the bottom plate of the testing machine (Figure 5). The vertical displacement is then the average value acquired by the three LVDTs.

The choice of placing three LVDTs in different positions is justified by the effect that geometric imperfections have on the acquisition of the displacements. It is worth noting, in fact, that shrinkage does not occur equally along all directions. As a result, the top and bottom faces of the specimens are no longer parallel after the mixture has hardened. This implies that the vertical load is not in the axial direction and induces a bending component

that causes the faces of the specimen to rotate during the compression test. In the case of using only one LVDT, the combined effect of the rotation of the faces and the distance of the LVDT from the axial position alters the acquisition of displacements, providing incorrect values. Averaging the values of three equidistant LVDTs will instead give a value quite similar to the axial displacement, therefore not affected by rotation.

Figure 6 shows the effect of rotation on displacements for the TQ12 and LT9 specimens. The comparison between the curves highlights the extent of the error committed if, instead of using three LVDTs, only the LVDT in position 1 had been used for the TQ12 specimen and only the LVDT2 or only LVDT3 for the LT9 specimen.

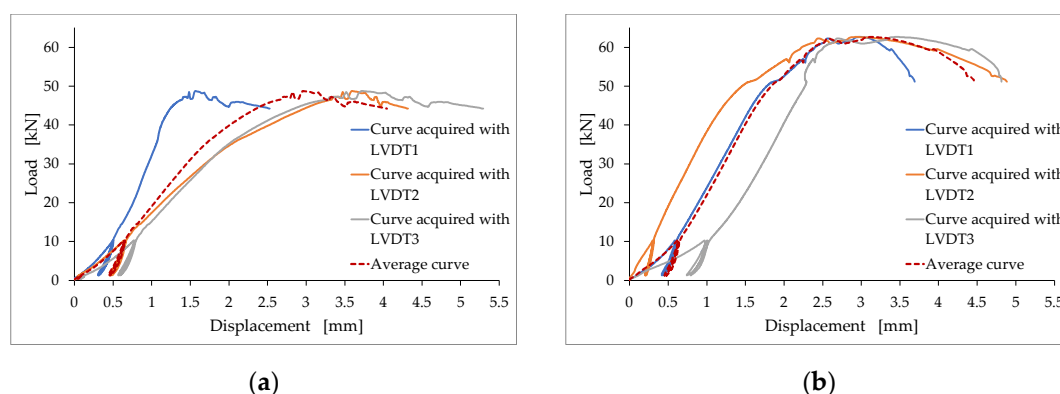

**Figure 6.** Two cases of significant rotation of the upper face during the compression test: (a) TQ12 specimen; (b) LT9 specimen.

### 3.3 Identification of the Stiffness

The second parameter that characterizes an earthen construction material is stiffness, namely the extent to which an object resists deformation in response to an applied force. In brittle materials, there are actually several ways to estimate stiffness from experimental data. Indeed, it can be either the slope of the stress/strain curve at any specified stress or strain (tangent stiffness, or tangent modulus), or the slope of the straight line connecting the origin of the stress/strain curve with another point on the curve (secant stiffness, or secant modulus). Among all the tangent moduli, moreover, the tangent modulus at the origin (initial stiffness) is of particular significance. This value is in fact associated with the behavior of the material for low load values, a behavior that is linear elastic for most of the brittle materials. Therefore, the tangent modulus at the origin is equivalent to Young's modulus in the elastic (reversible) deformation regime. Usually, the secant modulus is instead a percentage of Young's modulus and describes the stiffness of a material in the inelastic region of the stress-strain diagram.

To evaluate the tangent modulus at the origin correctly, it is of fundamental importance to have reliable experimental data for low load values. However, one of the main reasons for uncertainty on the experimental data derives from the coupling effect that characterizes the first phases of the compression test on brittle materials [111]. This phenomenon results from the adaptation of the plate of the testing machine to the upper surface of the specimen, which typically suffers from geometric imperfections (Section 3.2). The rotation of the plate of the testing machine during the adaptation phase affects the experimental result to such an extent that it cannot give a constitutive meaning to the initial part of the load/displacement curve [111]. Therefore, it is common practice to reconstruct the initial part of the load/displacement curve with a conventional straight-line segment, whose slope is equal to the slope reached by the load/displacement curve when the coupling effects are exhausted. This reconstruction procedure is a very delicate operation, as it depends on the experience of the person performing it. In practice, the point of connection between the linear segment and the rest of the curve is the point at which the slope of the curve assumes an approximately constant value. The slope of the segment is

equal to the average value of the slope immediately after the connection point. As an example, Figure 7 shows the reconstructed curve for the LT6 specimen. Since the reconstructed curve must pass through the origin, the reconstruction procedure also involves the translation of the non-reconstructed branch along the negative semi-axis of the displacements (Figure 7). In the subsequent identification process from the load/displacement curve to the stress/strain curve (see Figure 8 for the LT6 specimen), the slope of the reconstructed branch provides the tangent modulus at the origin.

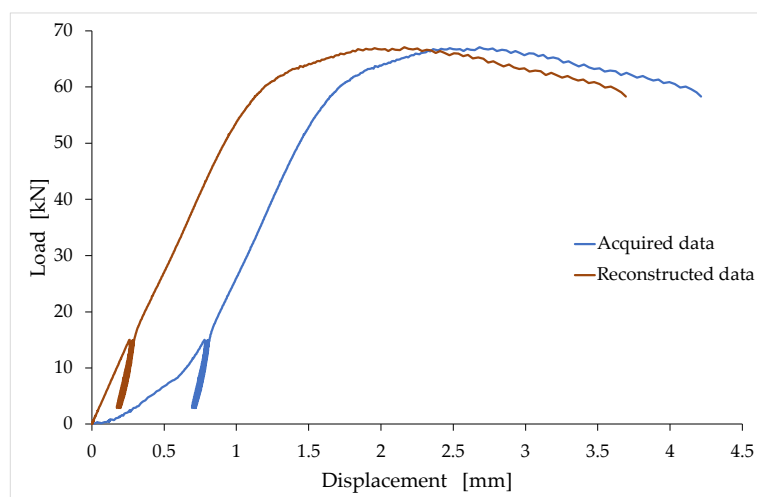

**Figure 7.** Replacement of the first branch of the load/displacement curve with a straight-line segment that passes through the origin and translation of the non-reconstructed branch to preserve the continuity between reconstructed and non-reconstructed branches: LT6 specimen (180 curing days).

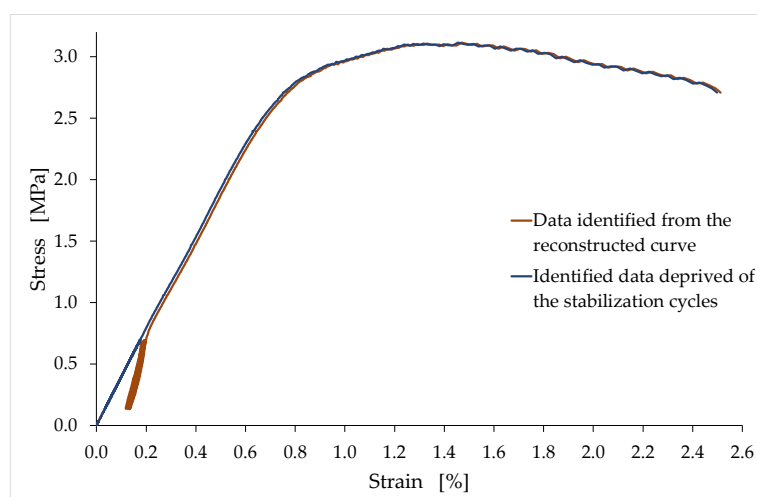

**Figure 8.** Elimination of the stabilization cycles from the stress/strain curve: LT6 specimen.

In order to favor the coupling between the specimen and the testing machine, it is possible to carry out some stabilization cycles [111], which consist of repeated unloading-reloading cycles performed for a fraction of the presumed maximum load (Figure 7). The effect of the stabilization cycles is to shorten the coupling phase, which means that the adaptation phenomena cease for a lower value of the applied load. If the stabilization process is successful, the slope of the load/displacement curve at the end of the last stabilization cycle is equal to the slope that the load/displacement curve would have shown in the absence of stabilization, at the end of the coupling phenomena. It is worth noting that the minimum load value in an unloading-reloading cycle is always greater than zero, as the total removal of the load would cause loss of contact between the testing machine and the specimen. The choice of the load value at which to start the unloading-reloading cycles is



also up to the operator and strongly depends on his experience. This value varies approximately between 10% and 20% of the presumed maximum load.

The number of unloading-reloading cycles must be at least three. The execution of the unloading/reloading cycles ends when the incremental displacement accumulated at the end of a cycle is sufficiently small, that is, lower than a predetermined maximum threshold. The number of unloading/reloading cycles in Figure 7 is equal to four.

The accumulation of displacements during the unloading/reloading cycles is due to creep and other inelastic phenomena [109]. After the reconstruction of the first linear branch, the procedure for identifying the stress/strain curves proceeds with the elimination of the stabilization cycles (and, consequently, of the accumulated strain), to provide monotonic non-decreasing curves up to the maximum stress (Figure 8).

## 4 Experimental Results and Discussion

### 4.1 Effect of RH Shredding on Compressive Strength

The behavior of the specimens under uniaxial compression load was of the brittle type, with pronounced softening branches after the maximum load (Figure 9). In particular – as common for fragile materials – during the softening phases the damage phenomena produced extensive crack patterns, visible to the naked eye on the faces of the specimens. However, the specimens retained some degree of compactness even when removed from the testing machine (Figure 10).

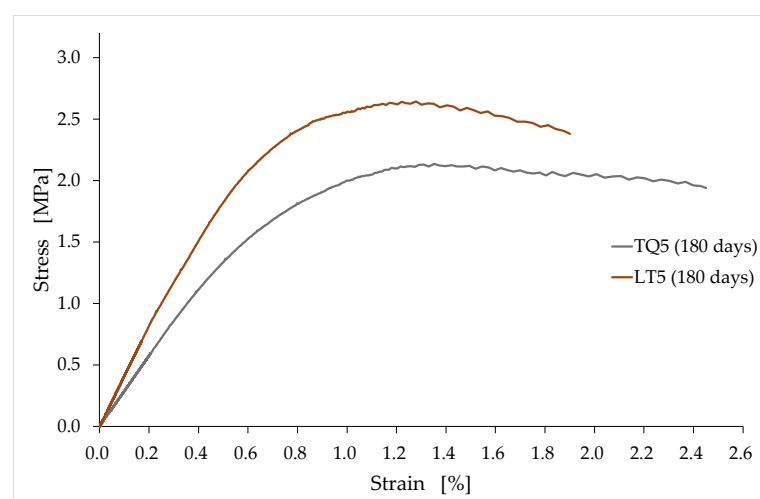

**Figure 9.** Comparison between the stress-strain curves of the TQ5 specimen and the LT5 specimen.

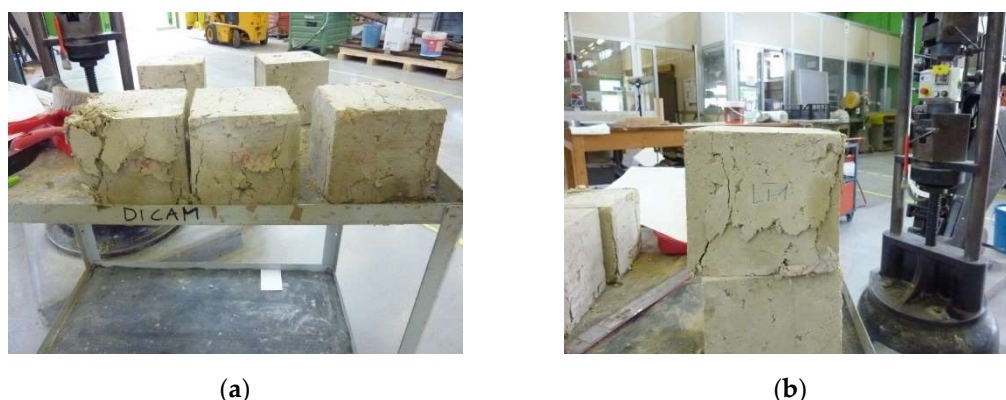

**Figure 10.** Appearance of the specimens after removal from the testing machine: (a) Three TQ specimens in the foreground; (b) Detail of an LT specimens.

As anticipated in Section 1, the results of the experimental campaign allowed us to highlight some unexpected results, as well as confirm the expected results. Among the confirmed expected results is that the softening branches are longer for TQ specimens than for LT specimens (Figure 9). In fact, the greater length of the vegetable fiber in the TQ specimens provides an increased binding effect, which allows a better exploitation of the hardened mixture beyond the stress peak.

As far as the effect of the RH length on the compressive strength is concerned, however, it is not possible to draw definitive conclusions, due to the high dispersion of the data shown by these tests (Figures 11–13).

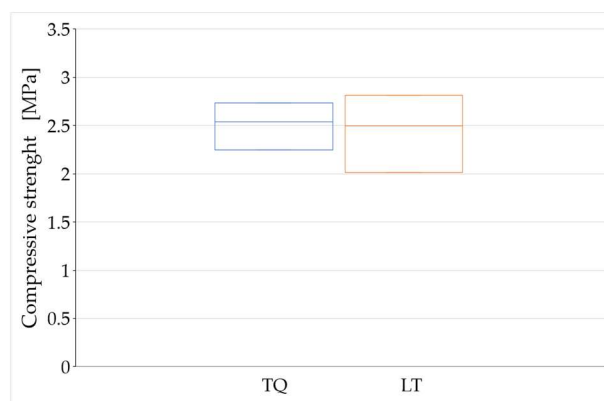

**Figure 11.** Minimum, average and maximum values of compressive strength after 90 days of curing.

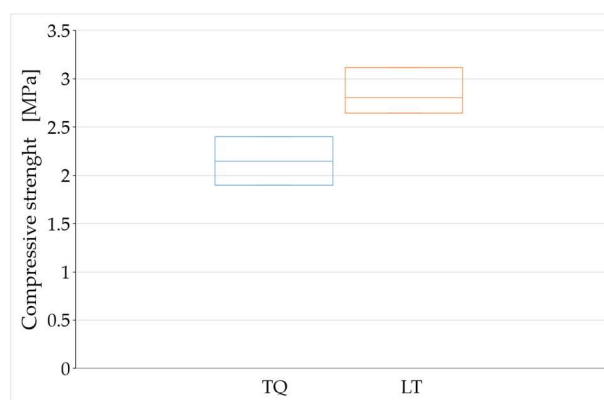

**Figure 12.** Minimum, average and maximum values of compressive strength after 180 days of curing.

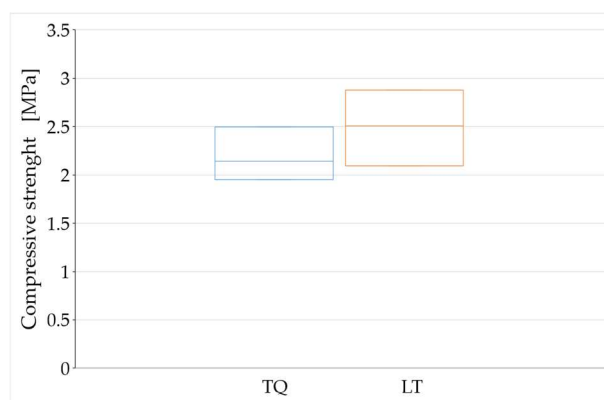

**Figure 13.** Minimum, average and maximum values of compressive strength after 450 days of curing.

The high variability of the compressive strength values is probably a consequence of the difficulties encountered in compacting the fresh mixtures inside the formworks, in particular for the LT specimens. This resulted in a non-optimal filling of the formworks, with some air bubbles persisting on the contact surfaces between the two fresh mixtures and the formworks. Compaction was particularly problematic at the vertexes of some specimens (Figure 3(b)), which resulted in their exclusion from the experimental program. The final effect after the hardening of the remaining specimens is in any case that of a defectiveness that negatively influenced the determination of the compressive strength.

The reason for the greater compaction difficulties in LT specimens compared to TQ specimens is that the shredding the RH resulted in the need to wet a larger surface of RH. Since the volume of mixing water was identical for the two mixtures, this subtracted water from the mixture of the LT specimens, reducing their workability. The greater defectiveness of the LT specimens compared to the TQ specimens is particularly evident in Figures 11 and 13, where the range of variability of the compressive strength is greater for the LT specimens than for the TQ specimens.

For the aforementioned reasons, the average values obtained for the groups of specimens with the same curing time only give indications about a trend that would deserve further investigation on a greater number of specimens. The variation of these average values over time (Figure 14) seems to show a weak sensitivity of the compressive strength to the RH particle size, in particular after long curing times. To be precise, the compressive strength after long curing times appears to be higher for the LT specimens than for the TQ specimens.

Having a higher compressive strength for the LT specimens compared to the TQ specimens is actually an expected result, as it is reasonable to assume that the greater contact surface (between RH and lime) generated by shredding favors the formation of Si-O-Si bonds (Section 2), with an increased bio-cementing effect (Section 1.2). However, one should take this result with caution, as the difference in compressive strength is small and could fall within the uncertainty range due to the dispersion of the results.

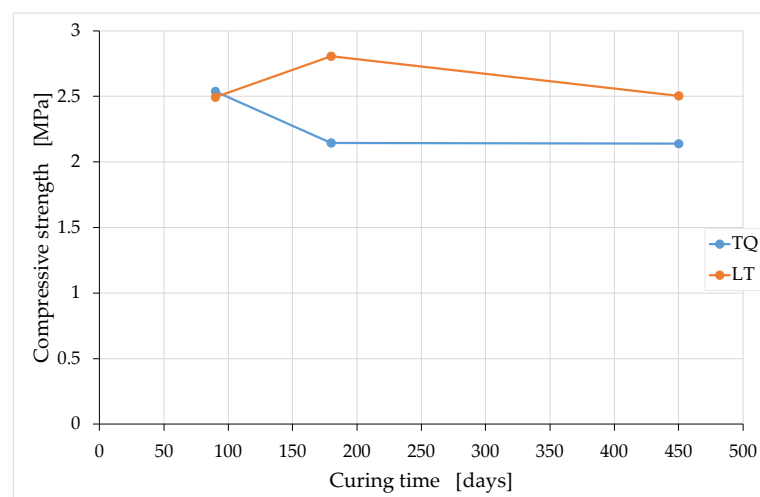

**Figure 14.** Trend over time of the average compressive strength values for the TQ and LT mixes.

A possible explanation of the modest increase in compressive strength may be the fact that the contact between the RH and the lime does not occur directly, since the lime is just one of the components of the earthen mixture. In other words, the contact takes place, in different percentages, between the RH and the various components of the earthen mixture, including part of the lime contained in the mixture. Since not all the lime in the mixture comes into direct contact with the RH, a given increase in the RH surface does not produce an increase of Si-O-Si bonds to the same extent, but by a smaller percentage. This means that, for the same quantities used, the number of bio-cementing bonds could



increase by pre-mixing the lime together with the RH immediately before inserting them into the mixture.

Another result that seems to emerge from Figure 14, albeit within the limits already stated, is that the compressive strength remains almost constant after a sufficiently long curing period. A similar behavior occurs in soft clays mixed with cement as a chemical stabilizer [115]. In particular, [116] found that the increase in the compressive strength of a clay-cement mixture is rapid in the first curing period and slows down significantly over time. A few years later, [117] proposed a generalized equation to estimate the increase in the unconfined compressive strength with the curing time for clay-cement mixtures:

$$q_D/q_{28} = 0.039 + 0.283 \ln(D), \quad (1)$$

where  $D$  is the curing time in days,  $q_D$  is the strength at time  $D$  and  $q_{28}$  is the strength at 28 days.

According to Equation (1), the values of  $q_{180}$  and  $q_{450}$  – the compressive strengths at 180 and 450 days – are equal to:

$$q_{180} = 1.509q_{28}, \quad (2)$$

$$q_{450} = 1.768q_{28}, \quad (3)$$

from which it follows that the percentage increase of the compressive strength from 180 to 450 days of curing is equal to 17%:

$$q_{450} - q_{180}/q_{180} = 0.172. \quad (4)$$

This value is a consequence of the two main chemical reactions that regulate the behavior of the clay-cement mixtures, namely the primary hydration reaction between cement and water and the secondary pozzolanic reaction between the lime released from the cement and the clay minerals [118]. Since the TQ and LT mixes benefit from only one of these chemical reactions – the reaction between lime and clay minerals – the expected percentage variation between 180 and 450 days of curing for the TQ and LT mixes is significantly less than 17%. This, combined with the fact that the dispersion of the experimental data lies in a range of values wider than 17% (Figures 12,13), justifies the impossibility of being able to obtain definitive indications on the trend of the compressive strength over time from Figure 14.

Similar observations and conclusions are valid for the comparison between the values of  $q_{90}$  and  $q_{180}$  – the compressive strengths at 90 and 180 days – given that Equation (1) returns a percentage increase of 15% between 90 and 180 days of curing:

$$q_{90} = 1.312q_{28}, \quad (5)$$

$$q_{180} - q_{90}/q_{90} = 0.149. \quad (6)$$

#### 4.2 Effect of RH Shredding on Stiffness

The trend over time of stiffness is much richer in information than that of the compressive strength.

The first thing to highlight concerns the behavior of the ascending branch of the stress/strain curve, for both the TQ and LT mixes. In both cases, in fact, after the first linear branch (reconstructed as shown in Section 3.3), the tangent modulus is at first decreasing and, subsequently, increasing. The tangent lines in Figure 15 show this effect for the LT6 specimen: the slope of the  $t_1$  line is greater than the slope of the  $t_2$  line, while the slope of the  $t_2$  line is less than the slope of the  $t_3$  line. Therefore, in the central part of the ascending branch, the stress/strain curve has an inflection point, at which the curvature of the stress/strain curve changes sign. This is an anomalous behavior for a brittle material,

since the tangent modulus in the ascending branch of the stress/strain curve of brittle materials is a monotonic non-increasing function.

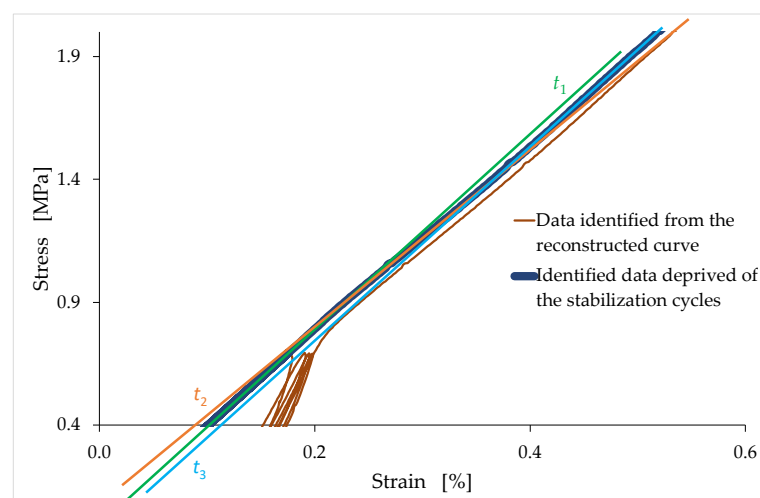

**Figure 15.** Detail of Figure 8:  $t_1$  is the tangent line at the end of the linear branch,  $t_2$  is the tangent line at the inflection point and  $t_3$  is the tangent line drawn for a stress value greater than the stress at the inflection point.

The cause of the continuous decrease in the tangent modulus is the progression of damage phenomena, which originate in the very first phases of the compressive load test [111]. Obviously, damage phenomena develop in earthen materials in the same way as in all other brittle materials. However, the flex in Figure 15 indicates that a second phenomenon occurs in the ascending branch of the stress/strain curve and counteracts the effect that damage has on the value of the tangent modulus. Since the combined action of the two phenomena causes the material to harden above the flex of Figure 15, the second phenomenon develops more rapidly than damage in the first part of the stress/strain curve and becomes prevalent on damage after the inflection point. In the remainder of this paper, we will assume that this is the compaction effect, due to the closing of the voids caused by the compressive load.

Approaching the peak of the stress/strain curve, damage phenomena develop more and more rapidly [107], which again inverses the ratio between the contributions that the two phenomena have in determining the value of the tangent modulus. This gives rise to a second inflection point – located in the upper part of the ascending branch – with a second inversion in the sign of the curvature. Therefore, as the applied load increases, the ascending branch of the stress/strain curve changes, a first time, from being concave (concave downward) to convex (concave upward) and, a second time, from being convex to concave. In the two concave portions, the damage prevails over the compaction causing a decrease in the tangent modulus. On the contrary, in the convex portion, the compaction prevails over the damage causing an increase in the tangent modulus. In the two inflection points, the effects on the tangent modulus of damage and compaction are equal and opposite, canceling each other out.

Due to the hardening caused by compaction, the maximum tangent modulus in the convex part is greater than the tangent modulus at the origin. Therefore, contrarily to what usually happens in brittle materials, the largest of all tangent moduli along the ascending branch of the stress/strain curve is not the tangent modulus at the origin.

The ratio between the maximum tangent modulus (maximum tangent stiffness) and the tangent modulus at the origin (tangent stiffness at the origin) is greater for LT specimens than for TQ specimens, regardless of the curing time (Figure 16). This is probably due to the lower workability of the LT mix and the consequent lower compaction degree of the LT specimens compared to the TQ specimens. In fact, having a lower degree of

initial compaction means that the LT specimens have a greater number of voids compared to the TQ specimens. Therefore, the compressive load can close a greater number of voids in the LT specimens. This amplifies the hardening effect induced by the closure of the voids during the compressive test and provides a greater contribution to the increase in the tangent modulus. In the curing interval analyzed, this contribution appears to be almost constant over time (Figure 16).

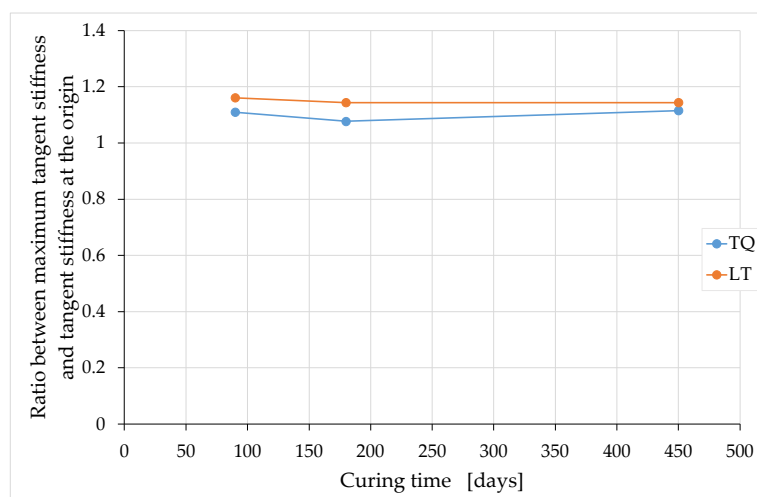

**Figure 16.** Trend over time of the average values of the ratio between maximum tangent stiffness and tangent stiffness at the origin: TQ and LT mixes.

On the contrary, both the tangent modulus at the origin and the maximum tangent modulus depend on the curing time, decreasing with it (Figures 17, 18). In both cases, however, the temporal course of the tangent moduli appears asymptotic, in the sense that the tangent moduli converge towards constant values at infinite time.

The decrease over time of the tangent moduli indicates that the deformability under compressive loads of the earthen mixtures increases over time. To the knowledge of the authors, this is the first time that an experimental campaign on earthen mixtures highlights the decrease over time in tangent moduli. This is actually the first experimental campaign conducted over a sufficiently long period to highlight how the mechanical properties of the earthen mixtures vary over time, particularly after long curing times.

Figures 17 and 18 also show that the two tangent moduli of the LT mix are greater than the two tangent moduli of the TQ mix at any time of curing.

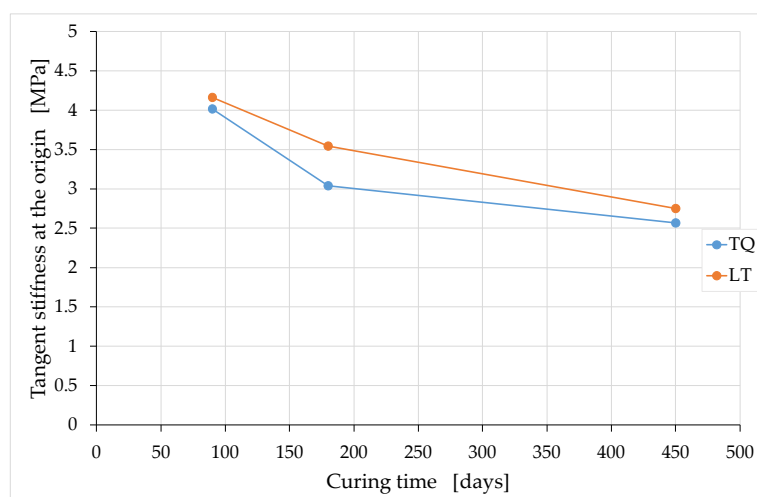

**Figure 17.** Trend over time of the average values of tangent stiffness at the origin: TQ and LT mixes.

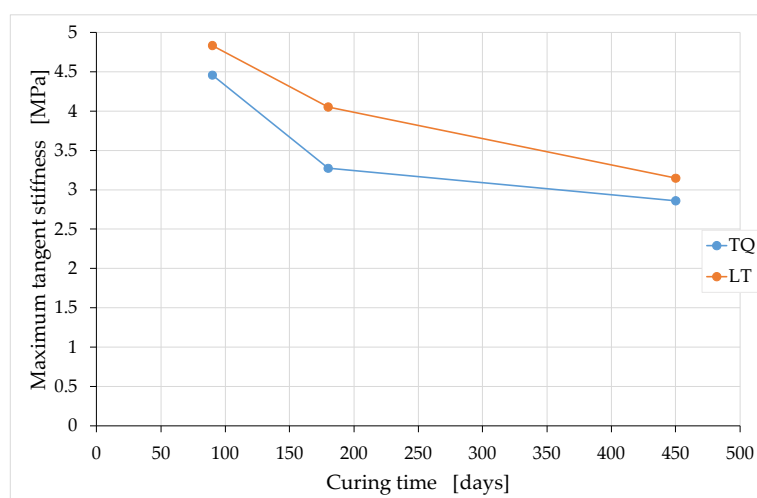

**Figure 18.** Trend over time of the average values of maximum tangent stiffness: TQ and LT mixes.

In other words, the LT specimens are stiffer than the TQ specimens are. This confirms the idea that inspired the experimental campaign (Section 2), according to which the shredding of the RH would have a Bio-cementing effect on the mixture, as it favors the formation of Si-O-Si bonds. In fact, a greater amount of Si-O-Si bonds in the mixture counteracts the deformability of the material, resulting in greater stiffness. In light of the observations made for the compressive strength (Section 4.1), it is likely that the preventive pre-mixing of the lime with the RH can enhance the Bio-cementing effect of the shredding, leading to even greater increases in stiffness than those observed in Figures 17 and 18.

To complete the study on how the mechanical properties of earthen mixtures vary over time, it is advisable to analyze how the slopes of the stabilization cycles vary over time. Being unloading-reloading cycles, in fact, the stabilization cycles provide information on the elastic and plastic components of the strain at the unloading stress value. Since the stabilization cycles are hysteretic, it is necessary to define their average slope conventionally: the average slope of a stabilization cycle is the slope of the straight line that joins the lower point of the cycle with the intersection point of the cycle. In Figure 19, the straight line  $r_1$  provides the slope of the first stabilization cycle and the straight line  $r_4$  provides the slope of the fourth stabilization cycle. As the stabilization process proceeds, the width of the hysteretic cycles decreases and the average slope of the cycles changes slightly (Figure 19).

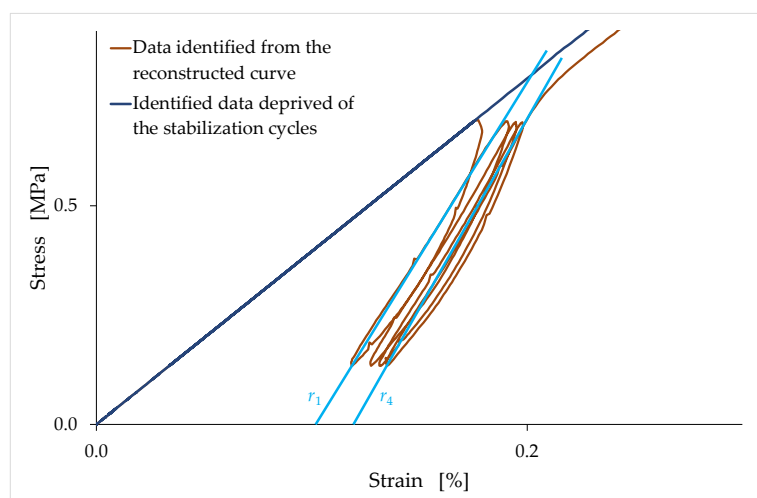

**Figure 19.** Evaluation of the average slope of unloading-reloading in a cycle as the slope of the straight line that joins the lower point of the cycle with the intersection point of the cycle.

The conventional slope of unloading-reloading is the slope of the straight line that approximates the last stabilization cycle (line  $r_4$  in Figure 19). Being a slope in the stress/strain plane, this value represents a stiffness. In natural brittle materials, the slope of a stabilization cycle is greater than the tangent stiffness at the origin.

It is worth noting that the slope of  $r_4$  in Figure 19 is greater than the slope of  $r_1$  and, more generally, the average unloading-reloading slope in Figure 19 increases as stabilization proceeds. This is in contrast to what happens in brittle materials as, usually, the average slope of a stabilization cycle decreases as stabilization proceeds. This anomalous result is a further effect of the compaction that occurs – in the latter case, under cyclic load – due to the partial closure of the voids induced by compression. We could say that the increase in the slopes of Figure 19 is an indirect confirmation of the effectiveness of the mechanical tamping, developed on an empirical basis as a means to stabilize the earthen mixtures in the rammed earth technique (Section 1.2).

By convention, the unloading carried out for the stabilization stress value, in the curve without stabilization cycles (Section 3.3), follows an ideal straight path with a slope equal to the unloading-reloading slope identified as above (line  $r$  in Figure 20). This straight line provides the elastic and plastic components of the strain for the stress value at unloading: the elastic and plastic strains are, respectively, the recovered and the permanent strains after the complete removal of the external load (Figure 20).

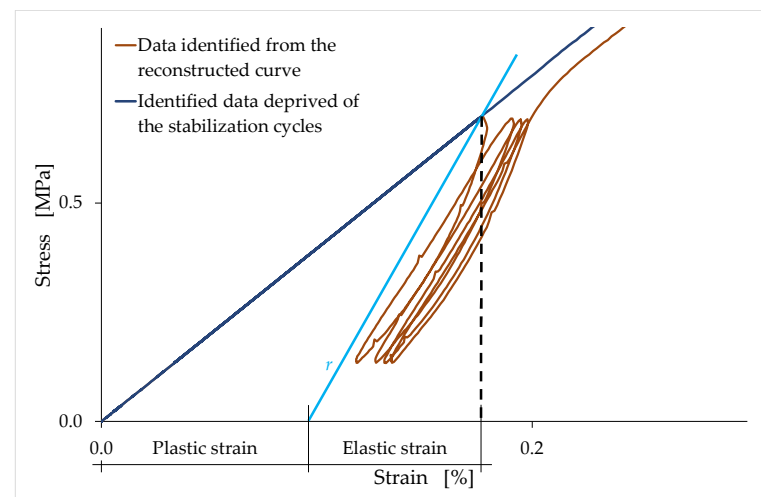

**Figure 20.** The two components of the strain at the stabilization stress value: the elastic strain is the strain recovered at the end of an ideal straight path of unloading, carried out for the strain value under consideration (the straight line  $r$  is parallel to the straight line  $r_4$  in Figure 19); the plastic strain is the permanent strain after unloading.

Figure 21 shows the average values of the slopes of unloading-reloading for the groups of three specimens with the same curing time. As with the tangent moduli, these values depend on the curing time, but the behavior is not asymptotic over time.

Of particular interest is the relationship over time between unloading-reloading slope (which is a stiffness) and tangent stiffness at the origin. As previously mentioned, in natural brittle materials, including earthen mixtures, the ratio between these two values is greater than one. The mixtures TQ and LT, however, behave abnormally (for a natural material) over long curing periods (Figure 22).

From a mathematical point of view, the trend in Figure 22 derives from the fact that, while the tangent moduli at the origin tend to constant values at infinite time (Figures 17 and 18), the unloading-reloading slopes decrease over time with an almost linear law (Figure 21). From a physical point of view, Figure 22 indicates that the elastic recovery at unloading increases significantly after 180 days of curing, for both mixtures. In fact, a decrease (towards the unit value) of the ratio between the two slopes (stiffnesses) leads to

an increase in the percentage deformation recovered after the complete removal of the external load and to a decrease in the percentage plastic deformation. In the ideal case of a ratio equal to unity, all the deformation accumulated before unloading is recoverable and there is no permanent deformation after the complete removal of the external load. This means that the specimen will revert to its original shape, regardless of the amount of deformation accumulated prior to unloading (perfectly elastic behavior).

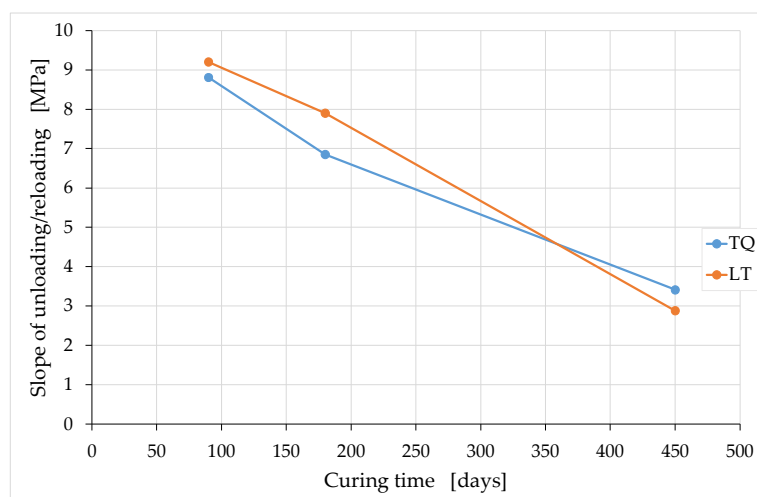

**Figure 21.** Trend over time of the average values of the unloading/reloading slope (TQ and LT mixes): the unloading/reloading slope is the slope of the last stabilization cycle.

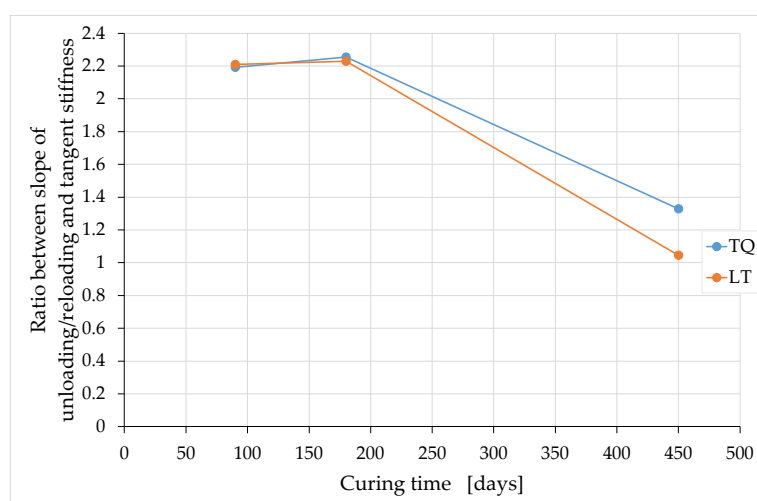

**Figure 22.** Trend over time of the average values of the ratio between unloading/reloading slope and tangent stiffness at the origin: TQ and LT mixes.

The anomalous behavior of the TQ and LT mixes is precisely the sharp decrease in the ratio between the stiffnesses after 180 days of curing, which usually does not occur spontaneously in a natural material. It is, in fact, an effect similar to that produced in natural rubber by the vulcanization, which is a chemical process used in the processing of rubber to make natural rubber lose its essentially plastic characteristics and acquire those of an essentially elastic and not very swellable material (if kept in contact with organic solvents). In a broader sense, the term vulcanization includes any chemical reaction that produces similar effects, not only on natural rubber, but also on synthetic rubber or any other material. Apart from the fact that it is a natural process and not a chemically induced one, we could therefore say that curing has a vulcanizing effect on the TQ and LT mixes. In particular, it is possible that the bonds formed thanks to the presence of silica in the RH

have an effect similar to that of the cross-links between polymer chains induced by vulcanization. In the specific case of the LT mix, a curing period of 450 days leads the specimens to lose their plastic behavior almost completely, up to a stress value equal to the stabilization stress.

Unfortunately, we have no data between 180 and 450 curing days. This does not allow us to make reliable hypotheses on the trend of the ratio between the stiffnesses beyond 450 curing days. At a first glance, however, Figure 22 seems to indicate that the stiffness ratio can assume values below unity beyond 450 curing days, especially for the LT mix. This would mean that the strain recovered at unloading is even greater than the strain at the time of unloading, a very anomalous behavior for a natural material.

Figure 22 also shows that the increase in the elastic recovery after 180 days of curing is greater for the LT mix than for the TQ mix. The greater reduction of the plastic component in the LT mix is due to the greater number of Si-O-Si bonds induced by the shredding of the RH, since the shredding generates a greater contact surface between the RH and the matrix. In fact, the Si-O-Si bonds hinder the plastic flow, as well as increase the stiffness.

## 5 Conclusions and Future Developments

This paper presents the results of uniaxial compression tests performed on two different earthen mixtures. The two mixtures differ only in the particle size of the natural fiber, which is unaltered rice husk for the first mixture (TQ mix) and shredded rice husk for the second mixture (LT mix). The mix designs of both mixtures make them suitable for use by extrusion in the 3D printing of earthen buildings. However, the attention of this experimental campaign did not focus on the basic criteria that guarantee good printability properties (extrudability, buildability and workability with time), but rather on the variation over time of the mechanical properties under compression load. To this end, we performed compression tests at 90, 180 and 450 days of curing.

The experimental results highlighted anomalous behaviors over time of the two earthen mixtures, in particular for long curing times. Some of these behaviors are clearly recognizable after a curing time of 450 days. However, the experimental results on the whole indicate that it is necessary to carry out analyses on longer curing times, in order to be able to draw definitive conclusions on the trend over time of the mechanical properties of the earthen mixtures.

The most surprising results of this experimental campaign are two: the stiffness decreases over time with an asymptotic behavior and a vulcanization effect occurs spontaneously with aging. For a correct understanding of the mechanical behavior of earthen materials, it is necessary to analyze these two results together. In fact, the second one (spontaneous vulcanization) proved to be able to cancel most of the negative effects of the first one (decrease in stiffness). The prevalence of the vulcanization effect on the decrease in stiffness is particularly evident for the LT specimens, in which it allows the recovery (at unloading) of almost all the strains reached by the specimens at the time of unloading, if subjected to compression load test after a curing time of 450 days and unloaded at the stabilization load value. To be precise, the trend over time of the two phenomena would seem to indicate that the recovery of strain at unloading could be even greater than the strain at the time of unloading, for periods of curing exceeding 450 days and an unloading load equal to the stabilization load. In the case of confirmation of this trend, it would mean that the earthen mixtures are very suitable for use in repeated loading conditions, being able – in an advanced stage of curing – to recover most of the plastic strains accumulated in the first load cycles. For a better understanding of this behavior it is therefore advisable to carry out uniaxial compression tests with unloading/reloading cycles at regular displacement intervals (in addition to the stabilization cycles), also taking into account curing periods longer than 450 days.

A further result of the experimentation concerns the higher stiffness values obtained for the LT specimens compared to those obtained for the TQ specimens. This is actually the expected result that motivated the experimentation itself. The higher stiffnesses of the



LT specimens find an explanation in the greater contact surface generated between the rice husk and the matrix by shredding the rice husk. In fact, those responsible for the increase in stiffness are the Si-O-Si bonds that can form on the contact surface, thanks to the reaction between the lime and the silica contained into the rice husk. Since a larger contact surface generates a greater number of Si-O-Si bonds, the larger contact surface is therefore also responsible for the higher stiffnesses of the LT specimens compared to the TQ specimens.

The analysis of the experimental data led to the conclusion that, in order to obtain the greatest possible number of Si-O-Si bonds, all other conditions being equal, it is advisable to pre-mix the lime and the rice husk before adding them to the other components of the mixture. This could allow us to achieve that increase over time, in terms of compressive strength and stiffness, which we did not observe in these tests. According to what the scientific literature reports, it is probable that the failure to increase the compressive strength over time also depends on the curing time interval considered. As for the stiffness, it is probable that the asymptotic decreasing trend is precisely a characteristic of the soil and that the quantity of Si-O-Si bonds was not sufficient to reverse this trend. This latter aspect also deserves further study.

Finally, the pre-mixing of lime and rice husk would also have a positive effect on durability. In fact, by ensuring that all the rice husk reacts with the lime, the pre-mixing would favor the mineralization of all the rice husk, preserving it from bacteria, molds, insects, rodents and fire. This is a very important aspect, especially as regards the preservation from mold attacks of the LT mix. In fact, since this mixture has shown some problems of workability, to make it suitable for 3D printing it may be necessary to increase its water content, which notoriously favors the formation of molds.

**Supplementary Materials:** The following are available online at [www.mdpi.com/xxx/s1](http://www.mdpi.com/xxx/s1), Figure S1: The BigDelta 3D printer made by WASP, Figure S2: The Crane WASP: a collaborative 3D printing system targeted to end-use production of functional buildings, Figure S3: The Gaia House by WASP: a 3D-printed prototype constructed of biodegradable materials, Figure S4: Filling of Gaia's honeycomb structure with rice husk, Figure S5: Floorplan of Gaia, Figure S6: Four of the eight wooden pillars that sustain Gaia's roof, Figure S7: Tecla's honeycomb structure, Figure S8: The two domes of Tecla in an advanced stage of completion, Figure S9: Some of Tecla's interior furnishings, Video S1: Unveiling the new WASP house 3D printer | Event 6-7 October 2018, Video S2: Gaia | 3D printed earth house with Crane WASP | Presentation Video, Video S3: Eco-sustainable 3D printed house – Tecla.

**Author Contributions:** Conceptualization, E.F. and A.C.; methodology, E.F., M.M., A.C., L.N., F. De F. and M.V.; software, E.F.; validation, E.F.; formal analysis, E.F.; investigation, E.F.; resources, E.F., M.M., A.C., L.N., F. De F. and M.V.; data curation, E.F.; writing—original draft preparation, E.F.; writing—review and editing, M.M., A.C., L.N., F. De F. and M.V.; visualization, E.F.; supervision, E.F., M.M., A.C., L.N., F. De F. and M.V.; project administration, E.F., M.M. All authors have read and agreed to the published version of the manuscript.

**Funding:** This research received no external funding.

**Acknowledgments:** The authors wish to thank RiceHouse s.r.l. (Andorno Micca (BI), Italy, website: [www.ricehouse.it](http://www.ricehouse.it)) for the supply of rice husk and the technical advice.

**Conflicts of Interest:** The authors declare no conflict of interest.

## References

- Kothman, I.; Faber, N. How 3D printing technology changes the rules of the game: Insights from the construction sector. *J. Manuf. Technol. Manag.* **2016**, *27* (7), 932–943.
- Tay, Y.W.D.; Panda, B.; Paul, S.C.; Noor Mohamed, N.A.; Tan, M.J.; Leong, K.F. 3D printing trends in building and construction industry: a review. *Virtual Phys. Prototyp.* **2017**, *12* (3), 261–276.
- Alhumayani, H.; Gomaa, M.; Soebarto, V.; Jabi, W. Environmental assessment of large-scale 3D printing in construction: A comparative study between cob and concrete. *J. Cleaner Prod.* **2020**, *270*, 122463.
- Veliz Reyes, A.; Gomaa, M.; Chatzivasileiadi, A.; Jabi, W.; Wardhana, N.M. Computing craft: early stage development of a robotically-supported 3D printing system for cob structures. In Computing for a better tomorrow, Proceedings of the 36th

- eCAADe Conference, Lodz University of Technology, Lodz, Poland, 19-21 September 2018; Kepczynska-Walczak, A., Bialkowski, S., Eds.; CumInCAD papers: 2018; Volume 1, pp. 791–800. 860
5. Perrot, A.; Rangeard, D.; Pierre, A. Structural built-up of cement-based materials used for 3D- printing extrusion techniques, *Mater. Struct.* **2016**, *49*, 1213–1220. 861
6. Le, T.T.; Austin, S.A.; Lim, S.; Buswell, R.A.; Law, R.; Gibb, A.G.F.; Thorpe, T. Hardened properties of high-performance printing concrete, *Cem. Concr. Res.* **2012**, *42* (3), 558–666. 862
7. Etzion, Y.; Saller, M. Earth Construction—A Review of Needs and Methods. *Archit. Sci. Rev.* **1987**, *30*(2), 43–48. 863
8. Olivier, M.; Mesbah, A. Influence of different parameters on the resistance of earth, used as a building material. Proceedings of the International Conference on Mud Architecture, Trivandrum, India, 25-27 November 1987. 864
9. Germen, A. The endurance of earths as building material and the discreet but continuous charm of adobe. *METU Journal of the Faculty of Architecture* **1979**, *5*(1), 37–68. 865
10. Keefe, L. *Earth Building Methods and Materials, repair and conservation*; Taylor & Francis: London, New York, 2005. 866
11. Deboucha, S.; Hashim, R. A review on bricks and stabilized compressed earth blocks. *Scientific Research and Essays* **2011**, *6*(3), 499–506. 867
12. Treloar, G.; Owen, C.M.; Fay, M.R. Enviromental assessment of rammed earth construction systems. *Structural Survey* **2001**, *19* (2), 99–105. 868
13. Pacheco-Torgal, F. Jalali, S. Earth construction: lessons from the past for future eco-efficient construction. *Constr. Build. Mater.* **2012**, *29*(April), 512–519. 869
14. Gallipoli, D.; Bruno, A.W.; Perlot, C.; Salmon, N. *Raw earth construction: is there a role for unsaturated soil mechanics*; Taylor & Francis Group: London, UK, 2014. 870
15. Schroeder, H. *Sustainable Building with Earth*; Springer International Publishing, 2016. 871
16. Walker, P. Editorial. *Proc. Inst. Civ. Eng. Constr. Mater.* **2016**, *169*(5), 239–240. 872
17. Olivier, M.; Mesbah, A. Le matériau terre: Essai de compactage statique pour la fabrication de briques de terre compressées. *Bull.liaison Labo P. et Ch.* **1986**, *146*(January), 37–43. 873
18. Houben, H.; Guillaud, H. *Earth construction: a comprehensive guide*; Intermediate Technology Publications: London, UK, 1994. 874
19. Rigassi, V.; CRATerre-EAG. *Compressed earth blocks: manual of production*. Friedrich Vieweg & Sohn; Braunschweig, Germany, 1995. 875
20. Walker, P. Strength, durability and shrinkage characteristics of cement stabilised soil blocks. *Cem. Concr. Compos.* **1995**, *17*(4), 301–310. 876
21. Maniatidis, V.; Walker P. A Review of Rammed Earth Construction. DTi Project Report, DTi Partners in Innovation Project ‘Developing Rammed Earth for UK Housing’, Bath, UK, 1 May 2003. 877
22. Morel, J.-C.; Pkla, A.; Walker, P. Compressive strength testing of compressed earth blocks. *Constr. Build. Mater.* **2007**, *21*(2), 303–309. 878
23. Kouakou, C.H.; Morel, J.-C. Strength and elasto-plastic properties of non-industrial building materials manufactured with clay as a natural binder. *Appl. Clay Sci.* **2009**, *44*(1–2), 27–34. 879
24. Reddy, B.; Kumar, P.P. Cement stabilised rammed earth. Part A: Compaction characteristics and physical properties of compacted cement stabilised soils. *Mater. Struct.* **2011**, *44*(3), 681–693. 880
25. Reddy, B.; Kumar, P.P. Cement stabilised rammed earth. Part B: compressive strength and stress–strain characteristics. *Mater. Struct.* **2011**, *44*(3), 695–707. 881
26. Bruno, A.W.; Gallipoli, D.; Perlot, C.; Mendes, J. Effect of very high compaction pressures on the physical and mechanical properties of earthen materials. Proceedings of the 3<sup>rd</sup> European Conference on Unsaturated Soils – E-UNSAT 2016, Paris, France, 12-14 September 2016; P. Delage, Y.-J. Cui, S. Ghabezloo, J.-M. Pereira, A.-M. Tang, Eds.; 2016, Vol. 9, p. 14004. 882
27. McGregor, F.; Heath, A.; Fodde, E.; Shea, A. Conditions affecting the moisture buffering measurement performed on compressed earth blocks. *Build. Environ.* **2014**, *75*, 11–18. 883
28. Fabbri, A.; Morel, J.-C.; Gallipoli, D. Assessing the performance of earth building materials: a review of recent developments. *RILEM Technical Letters* **2018**, *3*, 46–58. 884
29. Verma, P.L.; Mehra, S.R. Use of soil-cement in house construction in the Punjab. *Indian Concr. J.* **1950**, *24*(4), 91–96. 885
30. Walker, P. *HB 195: The Australian Earth Building Handbook*; Standards Australia, 2002. 886
31. Walker, P.; Keable, R.; Martin, J.; Maniatidis, V. *Rammed earth: design and construction guidelines*; IHS BRE: BRE Bookshop Watford, UK, 2005. 887
32. Fitzmaurice, R. *Manual on stabilized soil construction for housing*; Technical Assistance Programme, United Nations: New York City, New York Country, 1958. 888
33. Spence, R.J.S. Predicting the performance of soil-cement as a building material in tropical countries. *Build. Sci.* **1975**, *10*, 155. 889
34. Alley, P.J. 1948. *Rammed Earth Construction*. New Zealand Engineering. 890
35. McHenry, P.G. *Adobe and rammed earth buildings: design and construction*. The University of Arizona Press: Tucson, Arizona, 1984. 891
36. Etzion, Y.; Saller, M. Earth Construction—A Review of Needs and Methods. *Archit. Sci. Rev.* **1987**, *30*(2), 43–48. 892
37. Smith, E.W.; Austin, G.S. *Adobe, pressed-earth, and rammed-earth industries in New Mexico*. New Mexico Bureau of Mines & Mineral Resources, bulletin 127: Socorro, NM, 1989. 893
38. Norton, J. *Building with Earth. A handbook*, 2nd ed.; Intermediate Technology Publications: London, UK, 1997. 894

39. Gooding, D. *Soil Testing for Soil-Cement Block Preparation*; University of Warwick: Coventry, UK, DTU Working Paper: WP38, 1993. 919
40. Montgomery, D. *Physical characteristics of soils that encourage SSB breakdown during moisture attack*; University of Warwick: Coventry, UK, Stabilised Soil Research Progress Report SSRPR03, 1998. 920
41. VITA (Volunteers in Technical Assistance). *Making buildings blocks with the CINVA-Ram block press, volunteers in technical assistance*, 3rd ed.; Intermediate Technology Publications: London, UK, 1975. 921
42. Reddy, B.; Jagadish, K.S. Influence of soil composition on the strength and durability of soil-cement blocks. *Indian Concrete Journal* **1995**, *69*(9), 517–524. 922
43. Walker, P.; Stace, T. Properties of some cement stabilised compressed earth blocks and mortars. *Mater. Struct.* **1997**, *30*(203), 545–551. 923
44. Reddy, B.; Lal, R.; Rao, K.N. Optimum Soil Grading for the Soil-Cement Blocks. *J. Mater. Civ. Eng.* **2007**, *19*(2), 139–148. 924
45. Reddy, B.; Latha, M.S. Influence of soil grading on the characteristics of cement stabilised soil compacts. *Mater. Struct.* **2014**, *47*(10), 1633–1645. 925
46. Burroughs, S. Soil Property Criteria for Rammed Earth Stabilization. *J. Mater. Civ. Eng.* **2008**, *20*(3), 264–273. 926
47. Burroughs, S. Recommendations for the Selection, Stabilization, and Compaction of Soil for Rammed Earth Wall Construction. *Journal of Green Building* **2010**, *5*(1), 101–114. 927
48. Reddy, B.; Kumar, P.P. Role of clay content and moisture on characteristics of cement stabilised rammed earth. Proceedings of the 11<sup>th</sup> International Conference on Non-Conventional Materials and Technologies (NOCMAT). Bath University, U.K, 6–9 September 2009; iisc: Bath, UK. 928
49. Nagaraj, H.B.; Rajesh, A.; Sravan, M.V. Influence of soil gradation, proportion and combination of admixtures on the properties and durability of CSEBs. *Constr. Build. Mater.* **2016**, *110*, 135–144. 929
50. Bryan, A.J. Criteria for the suitability of soil for cement stabilization. *Build. Environ.* **1988**, *23*(4), 309–319. 930
51. Reddy, B.; Jagadish, K.S. Properties of soil–cement block masonry. *Masonry International* **1989**, *3*(2), 80–84. 931
52. Ciancio, D.; Boulter, M. Stabilised rammed earth: a case study in Western Australia. *Proceedings of the Institution of Civil Engineers - Engineering Sustainability* **2012**, *165*(2), 141–154. 932
53. Heathcote, K.A. Durability of earthwall buildings. *Constr. Build. Mater.* **1995**, *9*(3), 185–189. 933
54. Morel, J.-C.; Bui, Q.B.; Hamard, E. Weathering and durability of earthen material and structures. In *Modern Earth Buildings: Materials, Engineering, Constructions and Applications*; Hall, M., Lindsay, R., Krayenhoff, M., Eds.; Woodhead Publishing: 2012, pp. 282–303. 934
55. Guettala, A.; Abibsi, A.; Houari, H. Durability study of stabilized earth concrete under both laboratory and climatic conditions exposure. *Constr. Build. Mater.* **2006**, *20*(3), 119–127. 935
56. Bui, Q.B.; Morel, J.-C.; Venkatarama Reddy, B.V.; Ghayad, W. Durability of rammed earth walls exposed for 20 years to natural weathering. *Build. Environ.* **2009**, *44*(5), 912–919. 936
57. Beckett, C.; Ciancio, D. Durability of cement-stabilised rammed earth: a case study in Western Australia. *Aust. J. Civ. Eng.* **2016**, *14*(1), 54–62. 937
58. Bruno, A.W.; Gallipoli, D.; Perlot, C.; Mendes, J. Effect of stabilisation on mechanical properties, moisture buffering and water durability of hypercompacted earth. *Constr. Build. Mater.* **2017**, *149*, 733–740. 938
59. Allinson, D.; Hall, M. Humidity buffering using stabilised rammed earth materials. *Proc. Inst. Civ. Eng. Constr. Mater.* **2012**, *165*(6), 335–344. 939
60. McGregor, F.; Heath, A.; Shea, A.; Lawrence, M. The moisture buffering capacity of unfired clay masonry. *Build. Environ.* **2014**, *82*, 599–607. 940
61. Oudhof, N.; Labat, M.; Magniont, C.; Nicot, P. 2015. Measurement of the hygrothermal properties of straw-clay mixtures. Proceedings of the First International Conference on Bio-based Building Materials – ICBBM 2015, Clermont Ferrand, France, 22–24 June 2015; Amziane, S., Sonebi, M., Eds.; RILEM Publications - Curran Associates, Inc.: New York, USA, 2017; pp. 474–479. 941
62. Arrigoni, A.; Grillet, A.C.; Pelosato, R.; Dotelli, G.; Beckett, C.; Woloszyn, M.; Ciancio, D. Reduction of rammed earth's hygroscopic performance under stabilisation: an experimental investigation. *Build. Environ.* **2017**, *115*, 358–367. 942
63. Webb, D. Stabilised soil and the built environment. *Renewable Energy* **1994**, *5*(5–8), 1066–1080. 943
64. Walker, P. Editorial. *Proc. Inst. Civ. Eng. Constr. Mater.* **2017**, *170*(1), 1–2. 944
65. Readle, D.; Coghlan, S.; Smith, J.C.; Corbin, A.; Augarde, C.E. Fibre reinforcement in earthen construction materials. *Proc. Inst. Civ. Eng. Constr. Mater.* **2016**, *169*(5), 252–260. 945
66. Plank, J. Applications of biopolymers and other biotechnological products in building materials. *Appl. Microbiol. Biotechnol.* **2004**, *66*(1), 1–9. 946
67. Yang, F.; Zhang, B.; Ma, Q. Study of sticky rice–lime mortar technology for the restoration of historical masonry construction. *Acc. Chem. Res.* **2010**, *43*(6), 936–944. 947
68. Maskell, D.; Heath, A.; Walker, P. Comparing the Environmental Impact of Stabilisers for Unfired Earth Construction. *Key Eng. Mater.* **2014**, *600*, 132–143. 948
69. Reddy, B.; Kumar, P.P. Embodied energy in cement stabilised rammed earth walls. *Energy Build.* **2010**, *42*(3), 380–385. 949
70. Gallipoli, D.; Bruno, A.W.; Perlot, C.; Mendes, J. A geotechnical perspective of raw earth building. *Acta Geotech.* **2017**, *12*(3), 463–478. 950
71. Lax, C. Life cycle assessment of rammed earth. Master thesis, University of Bath, UK, 2010. 951

72. Fujita, Y.; Ferris, F.G.; Lawson, R.D.; Colwell, F.S.; Smith, R.W. Subscribed content calcium carbonate precipitation by ureolytic subsurface bacteria. *Geomicrobiol. J.* **2000**, *17*(4), 305–318. 979
73. Renforth, P.; Manning, D.A.C.; Lopez-Capel, E. Carbonate precipitation in artificial soils as a sink for atmospheric carbon dioxide. *Appl. Geochem.* **2009**, *24*(9), 1757–1764. 980
74. Ivanov, V.; Stabnikov, V. *Construction Biotechnology: Biogeochemistry, Microbiology and Biotechnology of Construction Materials and Processes*; Springer: Singapore, 2016. 981
75. Cabalar, A.F.; Canakci, H. Direct shear tests on sand treated with xanthan gum. *Proc. Inst. Civ. Eng. Ground Improv.* **2011**, *164*, 57–64. 982
76. Chen, R.; Zhang, L.; Budhu, M. Biopolymer Stabilization of Mine Tailings. *J. Geotech. Geoenviron. Eng.* **2013**, *139*(October), 130128212232006. 983
77. Chang, I.; Im, J.; Prasidhi, A.K.; Cho, G.-C. Effects of Xanthan gum biopolymer on soil strengthening. *Constr. Build. Mater.* **2015**, *74*(10), 65–72. 984
78. Chang, I.; Prasidhi, A.K.; Im, J.; Cho, G.-C. Soil strengthening using thermo-gelation biopolymers. *Constr. Build. Mater.* **2015**, *77*, 430–438. 985
79. Aguilar, R.; Nakamatsu, J.; Ramírez, E.; Elgegren, M.; Ayarza, J.; Kim, S.; Pando, M.A.; Ortega-San-Martin, L. The potential use of chitosan as a biopolymer additive for enhanced mechanical properties and water resistance of earthen construction. *Constr. Build. Mater.* **2016**, *114*, 625–637. 986
80. Ayeldeen, M.K.; Negm, A.M.; El Sawwaf, M.A. Evaluating the physical characteristics of biopolymer/soil mixtures. *Arabian J. Geosci.* **2016**, *9*(5), 329–339. 987
81. Pacheco-Torgal, F.; Ivanov, V.; Karak, N.; Jonkers, H. *Biopolymers and Biotech Admixtures for Eco-Efficient Construction Materials*; Woodhead Publishing: 2016. 988
82. Latifi, N.; Horpibulsuk, S.; Meehan, C.L.; Abd Majid, M.Z.; Tahir, M.M.; Mohamad, E.T. Improvement of Problematic Soils with Biopolymer—An Environmentally Friendly Soil Stabilizer. *J. Mater. Civ. Eng.* **2017**, *29*(2). 989
83. Nakamatsu, J.; Kim, S.; Ayarza, J.; Ramírez, E.; Elgegren, M.; Aguilar, R. Eco-friendly modification of earthen construction with carrageenan: Water durability and mechanical assessment. *Constr. Build. Mater.* **2017**, *139*, 193–202. 990
84. Qureshi, M.U.; Chang, I.; Al-Sadarani, K. Strength and durability characteristics of biopolymer-treated desert sand. *Geomech. Eng.* **2017**, *12*(5), 785–801. 991
85. Chen, C.; Wu, L.; Perdjion, M.; Huang, X.; Peng, Y. The drying effect on xanthan gum biopolymer treated sandy soil shear strength. *Constr. Build. Mater.* **2019**, *197*, 271–279. 992
86. Muguda Viswanath, S. Biopolymer Stabilised Earthen Construction Materials. PhD thesis, Durham University, UK, 2019. 993
87. Chang, I.; Im, J.; Cho, G.-C. Introduction of Microbial Biopolymers in Soil Treatment for Future Environmentally-Friendly and Sustainable Geotechnical Engineering. *Sustainability* **2016**, *8*(3), 251. 994
88. Stabnikov, V.; Ivanov, V.; Chu J. Construction Biotechnology: a new area of biotechnological research and applications. *World J. Microbiol. Biotechnol.* **2015**, *31*(9), 1303–1314. 995
89. Komnitsas, K.; Zaharaki, D. Geopolymerisation: A review and prospects for the minerals industry. *Miner. Eng.* **2007**, *20*, 1261–1277. 996
90. De Silva, P.; Sagoe-Crenstil, K.; Sirivivatnanon, V. Kinetics of geopolymerization: role of Al<sub>2</sub>O<sub>3</sub> and SiO<sub>2</sub>. *Cem. Concr. Res.* **2007**, *37*, 512–518. 997
91. Fletcher, R.A.; MacKenzie, K.J.; Nicholson, C.L.; Shimada, S. The composition range of aluminosilicate geopolymers. *J. Eur. Ceram. Soc.* **2005**, *25*, 1471–1477. 1000
92. Songpiriyakij, S.; Kubprasit, T.; Jaturapitakkul, C.; Chindaprasirt, P. Compressive strength and degree of reaction of biomass- and fly ash-based geopolymer. *Constr. Build. Mater.* **2010**, *24*, 236–240. 1001
93. Cheng, T.-W.; Chiu, J. Fire-resistant geopolymer produced by granulated blast furnace slag. *Miner. Eng.* **2003**, *16*, 205–210. 1002
94. Colombo, D. WASP arriva a 12 metri. *3Dprinting Creative* **2015**, September. 1003
95. Colombo, D. La BigDelta di WASP nel parco della stampa 3D. *3Dprinting Creative* **2016**, March. 1004
96. Colombo, D. Tecla, la casa stampata in 3D in terra cruda. *3Dprinting Creative* **2021**, April. 1005
97. Singh, B. Rice husk ash. In *Waste and supplementary cementitious materials in concrete*; Elsevier: 2018; pp. 417–460. 1006
98. Omatola, K.; Onojah, A. Rice Husk as a Potential Source of High Technology Raw Materials: A Review. *Journal of Physical Sciences and Innovation* **2012**, *4*, 1–6. 1007
99. Mathur, A.; Singh, U.; Vijay, Y.; Hemlata, M.S.; Sharma, M. Analysing performance for generating power with renewable energy source using rice husk as an alternate fuel. *Control Theory Inform.* **2013**, *3*, 64–71. 1008
100. Mohd Salahuddin Mohd Basri; Faizal Mustapha; Norkhairunnisa Mazlan; Mohd Ridzwan Ishak. Rice Husk Ash-based Geopolymer Binder: Compressive Strength, Optimize Composition, FTIR Spectroscopy, Microstructural and Potential as Fire Retardant Material. *Polymers* **2021**, *13*(24), 4373. 1009
101. Moretti, M.; Chiusoli, A.; Naldoni, L.; De Fabritiis, F.; Visonà, M. Earthen 3d printed constructions towards a new high-efficient way of building. In *Past and present of the earthen architectures in China and Italy*; Luvidi, L., Fratini, F., Rescic, S., Zhang, J., Eds.; Cnr Edizioni: Roma, Italy, 2021; pp. 147–155. 1010
102. Gomaa, M.; Jabi, W.; Veliz Reyes, A.; Soebarto, V. 3D printing system for earth-based construction: Case study of cob. *Autom. Constr.* **2021**, *124*, 103577. 1011

103. Ferretti, E.; Moretti, M.; Chiusoli, A.; Naldoni, L.; De Fabritiis, F.; Visonà, M. Mechanical Properties of a 3D Printed Wall Segment made with an Earthen Mixture. *Buildings*, submitted. 1038
104. Walker, P. Characteristics of Pressed Earth Blocks in Earth Blocks. Proceedings of the 11<sup>th</sup> International Brick/Block Masonry Conference, Tonji University, Shanghai, China, 14–16 October 1997; pp. 14–16. 1039
105. Aubert, J.E.; Maillard, P.; Morel, J.-C.; Al Rafii, M. Towards a simple compressive strength test for earth bricks? *Mater. Struct.* **2016**, *49*(5), 1641–1654. 1040
106. Ferretti, E.; Di Leo, A.; Viola, E. A novel approach for the identification of material elastic constants. In CISM Courses and Lectures - Problems in Structural Identification and Diagnostics: General Aspects and Applications, Proceedings of the Workshop on Problems in Structural Identification and Diagnostics, Bologna, Italy, 15–16 July 2002; Davini, C., Viola, E., Eds.; Springer-Verlag: Vienna, Austria, 2003; Volume 471, pp. 117–131. 1041
107. Ferretti, E. Experimental procedure for verifying strain-softening in concrete. *Int. J. Fract.* **2004**, *126*(2), L27–L34. 1042
108. Ferretti, E. On nonlocality and locality: Differential and discrete formulations. Proceedings of the 11<sup>th</sup> International Conference on Fracture 2005 – ICF11, Turin, Italy, 20–25 March 2005; International Congress on Fracture (ICF) - Curran Associates, Inc.: New York, USA, 2010; Volume 3, pp. 1728–1733. 1043
109. Ferretti, E.; Di Leo, A. Cracking and creep role in displacements at constant load: Concrete solids in compression. *CMC-Comput. Mater. Continua* **2008**, *7*(2), 59–79. 1044
110. Ferretti, E. Shape-effect in the effective laws of plain and rubberized concrete. *CMC-Comput. Mater. Continua* **2012**, *30*(3), 237–284. 1045
111. Ferretti, E. A discussion of strain-softening in concrete. *Int. J. Fract.* **2004**, *126*(1), L3–L10. 1046
112. Ferretti, E. On Strain-softening in dynamics. *Int. J. Fract.* **2004**, *126*(4), L75–L82. 1047
113. Ferretti, E. The Cell Method: An enriched description of physics starting from the algebraic formulation. *CMC-Comput. Mater. Continua* **2013**, *36*(1), 49–71. 1048
114. Ferretti, E.; Di Leo, A.; Viola, E. Computational aspects and numerical simulations in the elastic constants identification. In CISM Courses and Lectures - Problems in Structural Identification and Diagnostics: General Aspects and Applications, Proceedings of the Workshop on Problems in Structural Identification and Diagnostics, Bologna, Italy, 15–16 July 2002; Davini, C., Viola, E., Eds.; Springer-Verlag: Vienna, Austria, 2003; Volume 471, pp. 133–147. 1049
115. Saadeldin, R.; Siddiqua, S. Geotechnical characterization of a clay–cement mix. *Bull. Eng. Geol. Environ.* **2013**, *72*, 601–608. 1050
116. Porbaha, A.; Shibuya, S.; Kishida, T. State of the art in deep mixing technology. *Ground. Improv.* **2000**, *4*(3), 91–110. 1051
117. Horpibulsak, S.; Rachan, R.; Suddeepong, A.; Chinkulkijniwat, A. Strength development in cement admixed Bangkok clay: laboratory and field investigations. *Soil Found.* **2011**, *51*(2), 239–251. 1052
118. Bergado, D.T.; Anderson, L.R.; Miura, N.; Balasubramaniam, A.S. *Soft Ground Improvement in Lowland and Other Environments*, ASCE Press: New York, NY, 1996. 1053
