# Supplementary material for: Rice Husk Shredding as a Means of Increasing the Long-Term Mechanical Properties of Earthen Mixtures for 3D Printing
Source: Preprints.org preprint supplement (doi:10.20944/preprints202112.0360.v1), 2021-12-22
Supplement: Supplementary file 3 [file supplementary]

Archive with 2 entries (2 files):
- Supplementary material.pdf
- RH_paper.pdf
